# Supplementary material for: Copper-catalyzed synthesis of quinoline derivatives via tandem Knoevenagel condensation, amination and cyclization
Source: Royal Society of Chemistry journal article supplement (doi:10.1039/c6ra03798d), 2016-01-01
Supplement: c6ra03798d1.pdf [file c6ra03798d1.pdf]

Supporting Information

**Copper-Catalyzed Synthesis of Quinoline Derivatives *via* Tandem  
Knoevenagel Condensation, Amination and Cyclization**

Shiv Dhiman, Hitesh Kumar Saini, Nitesh Kumar Nandwana, Dalip Kumar and Anil Kumar\*

Department of Chemistry, Birla Institute of Technology and Science, Pilani 333 031,  
Rajasthan, India

E-mail: anilkumar@pilani.bits-pilani.ac.in

**Contents**

Copies of  $^1\text{H}$  and  $^{13}\text{C}$  NMR spectra of **4, 5, 6, 8, 9, 10, 11** and **12**

Single X-crystal data

References

Copies of  $^1\text{H}$  and  $^{13}\text{C}$  NMR spectra of 4, 5, 6, 8, 9 & 10

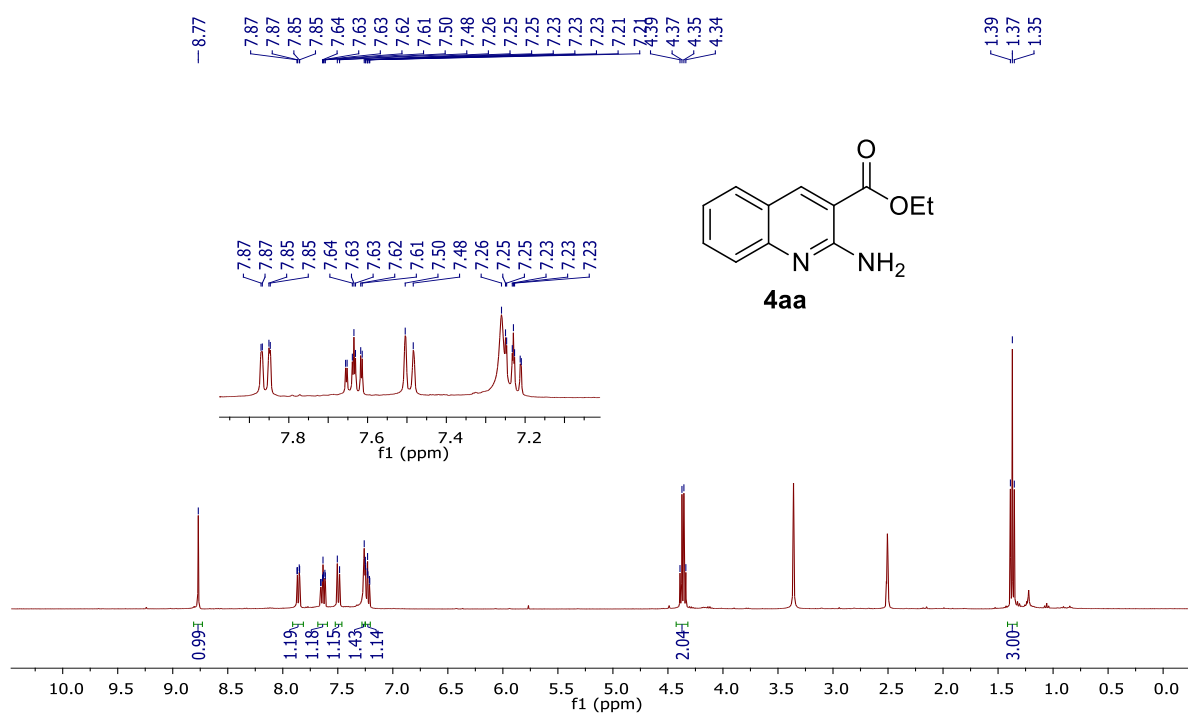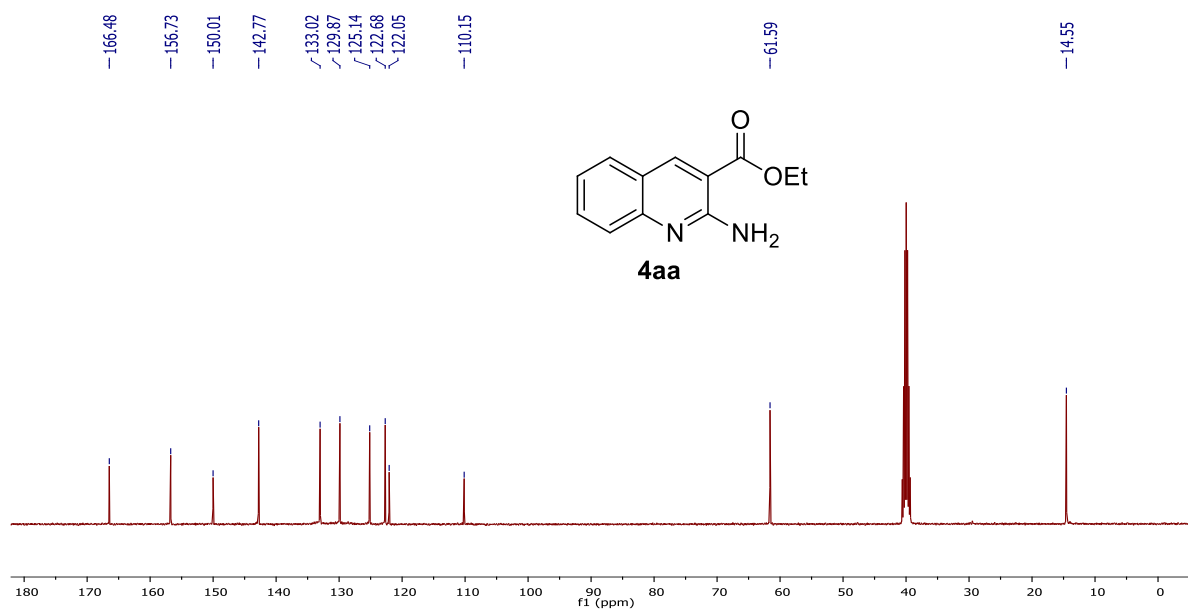

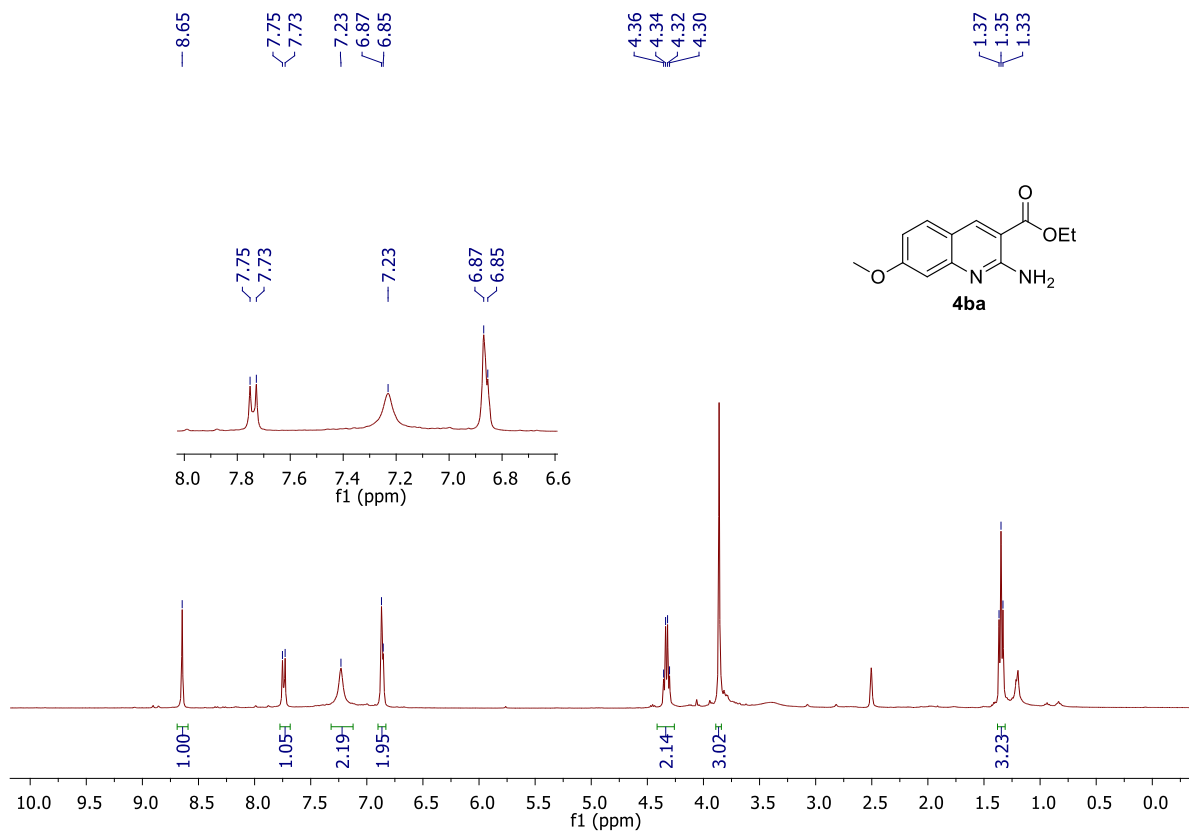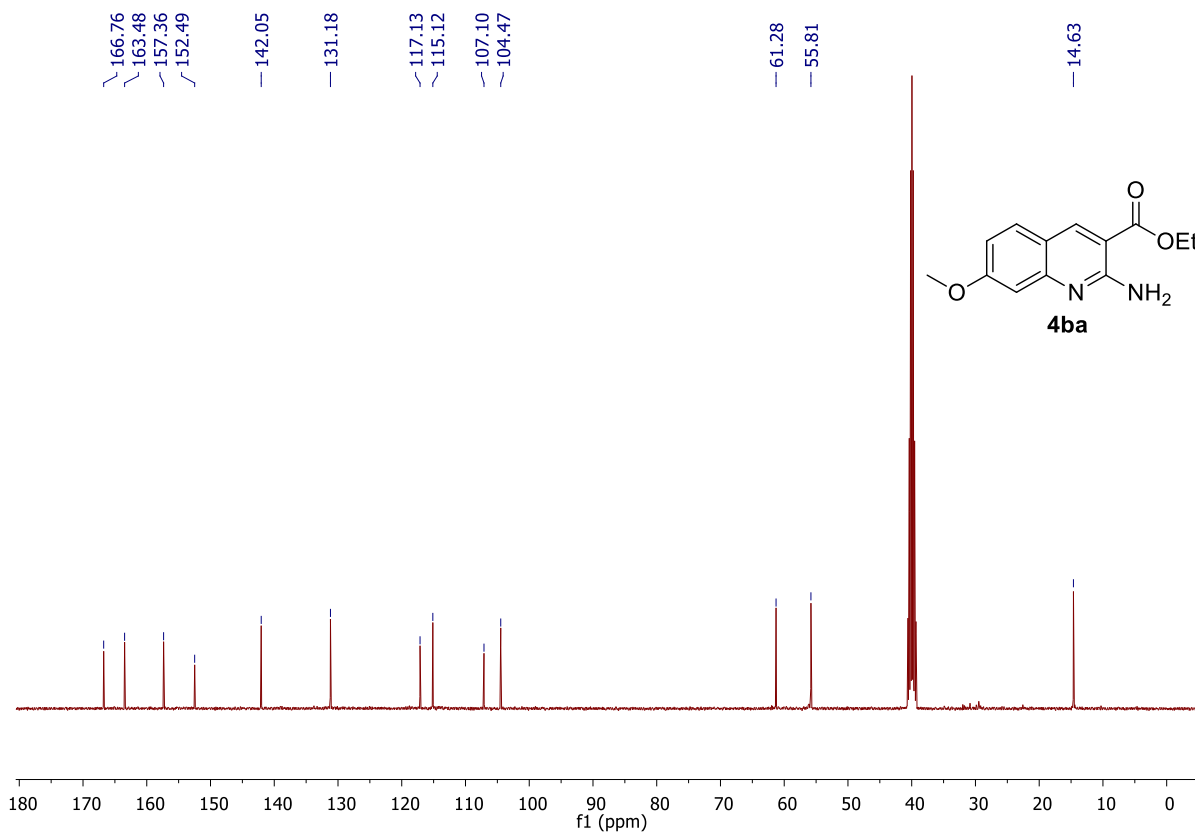

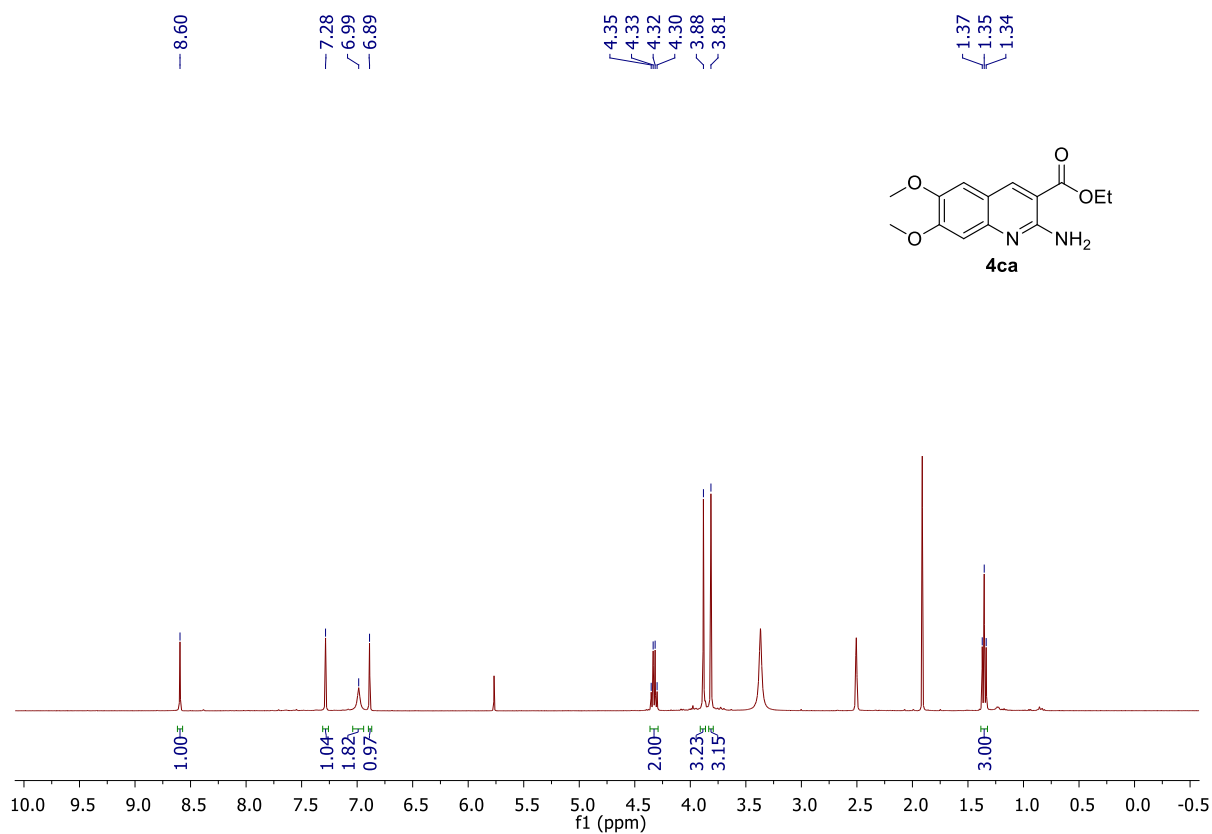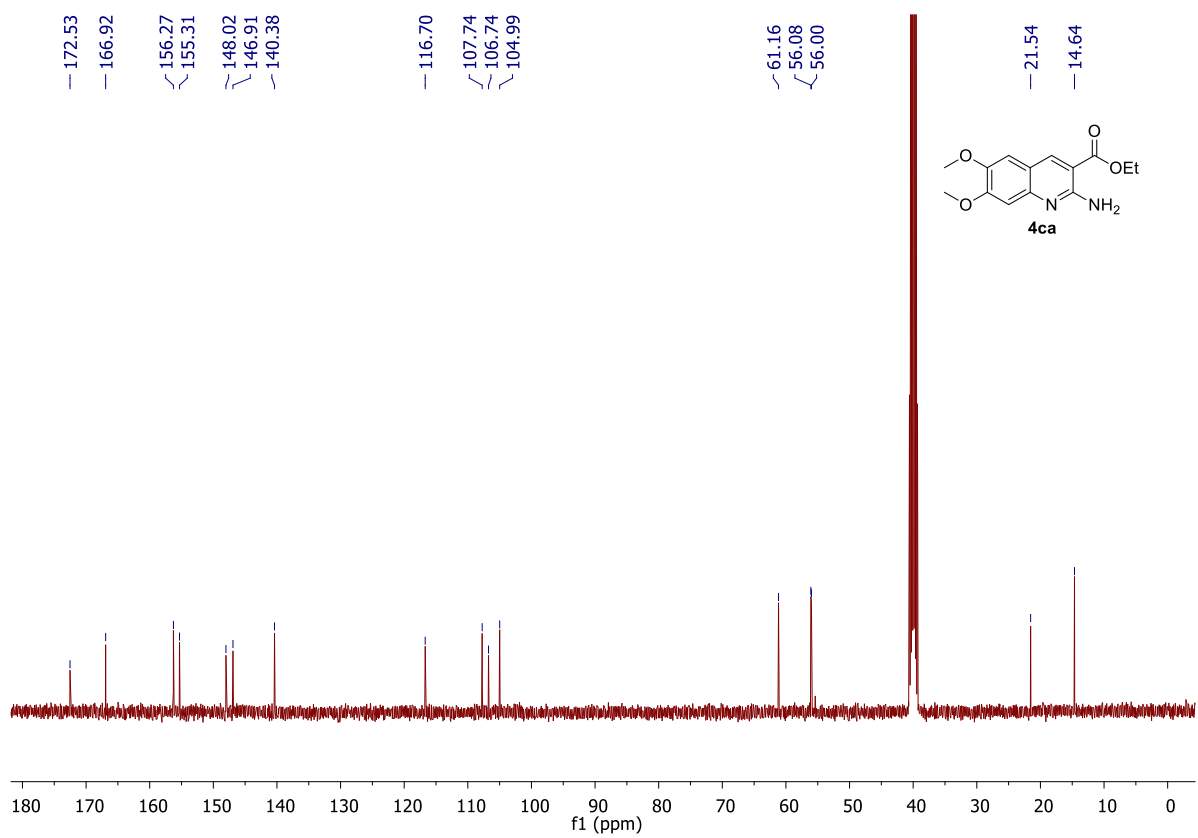

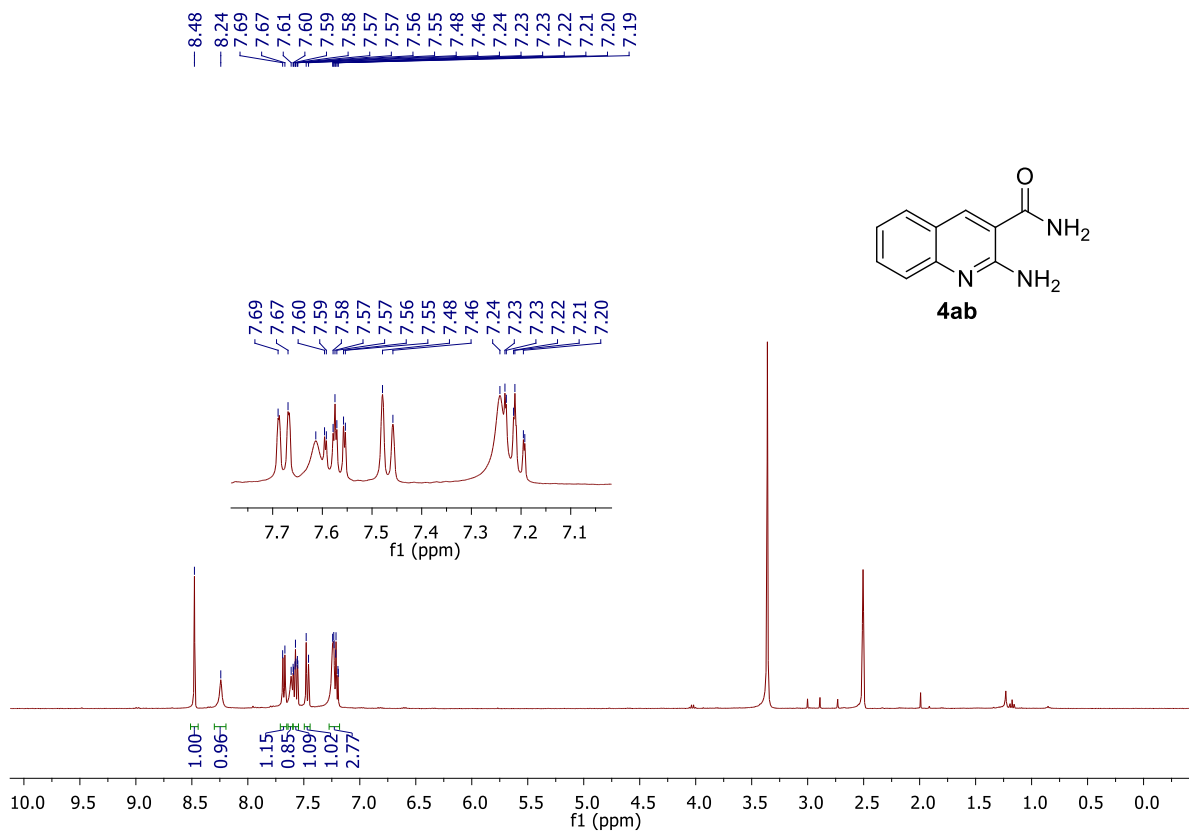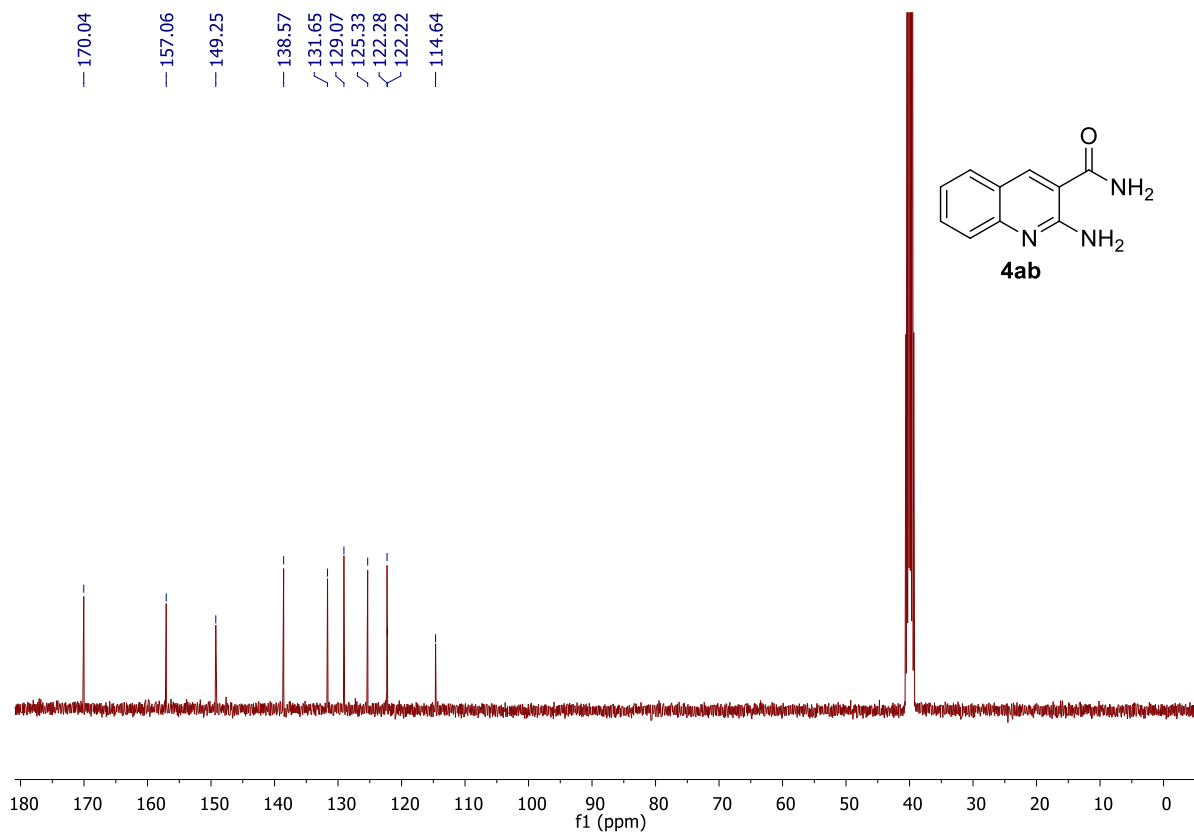

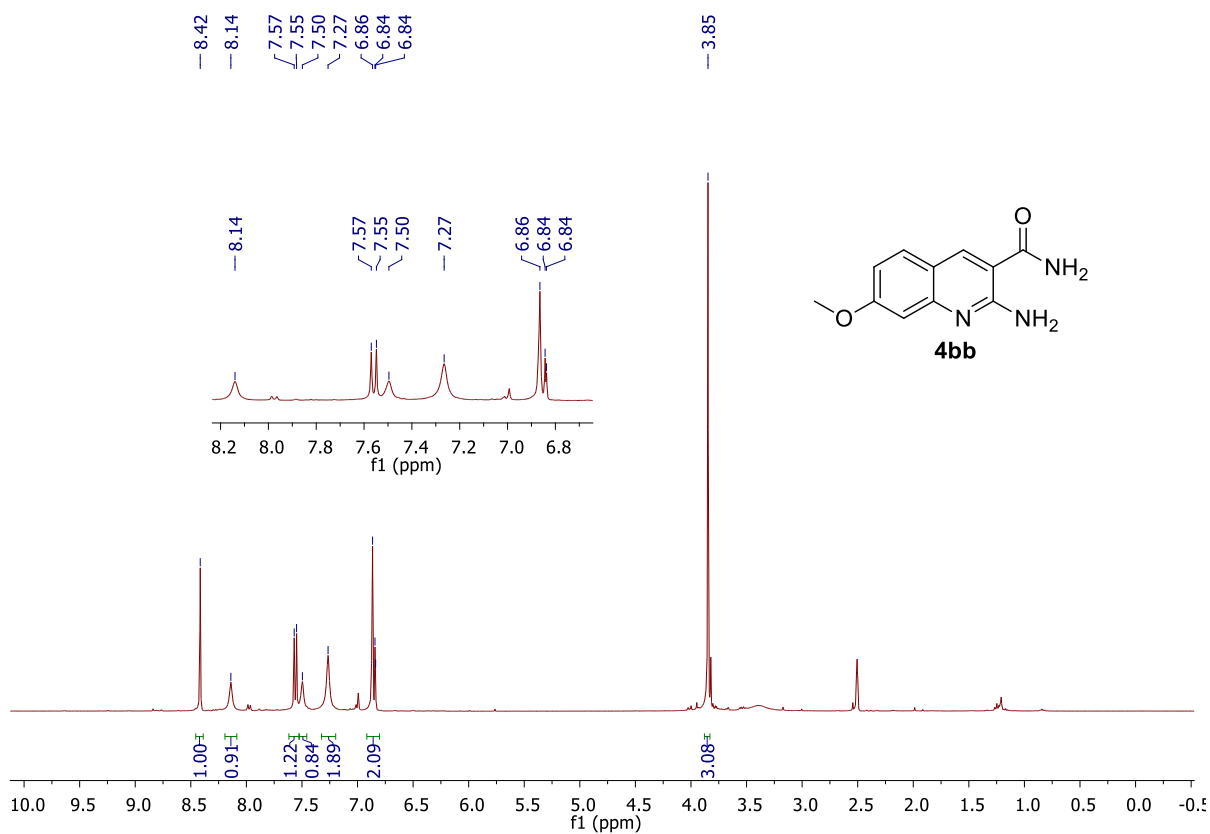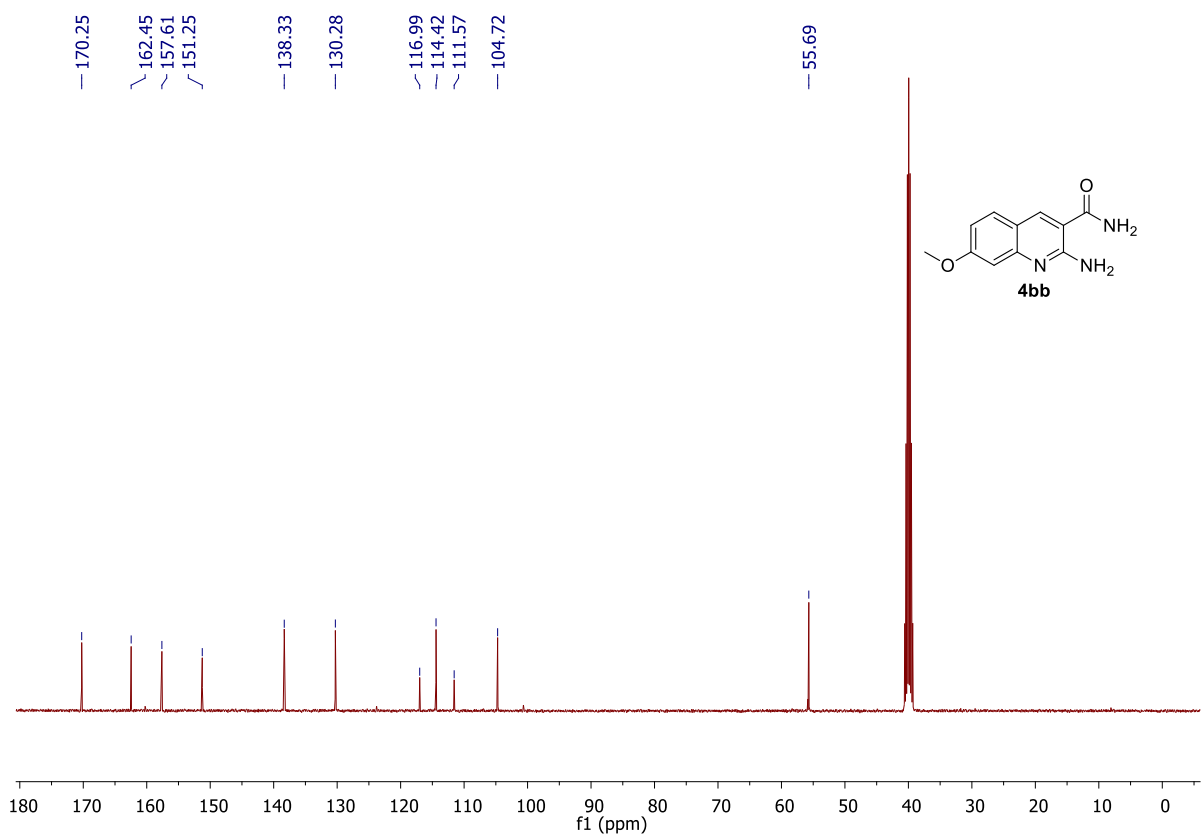

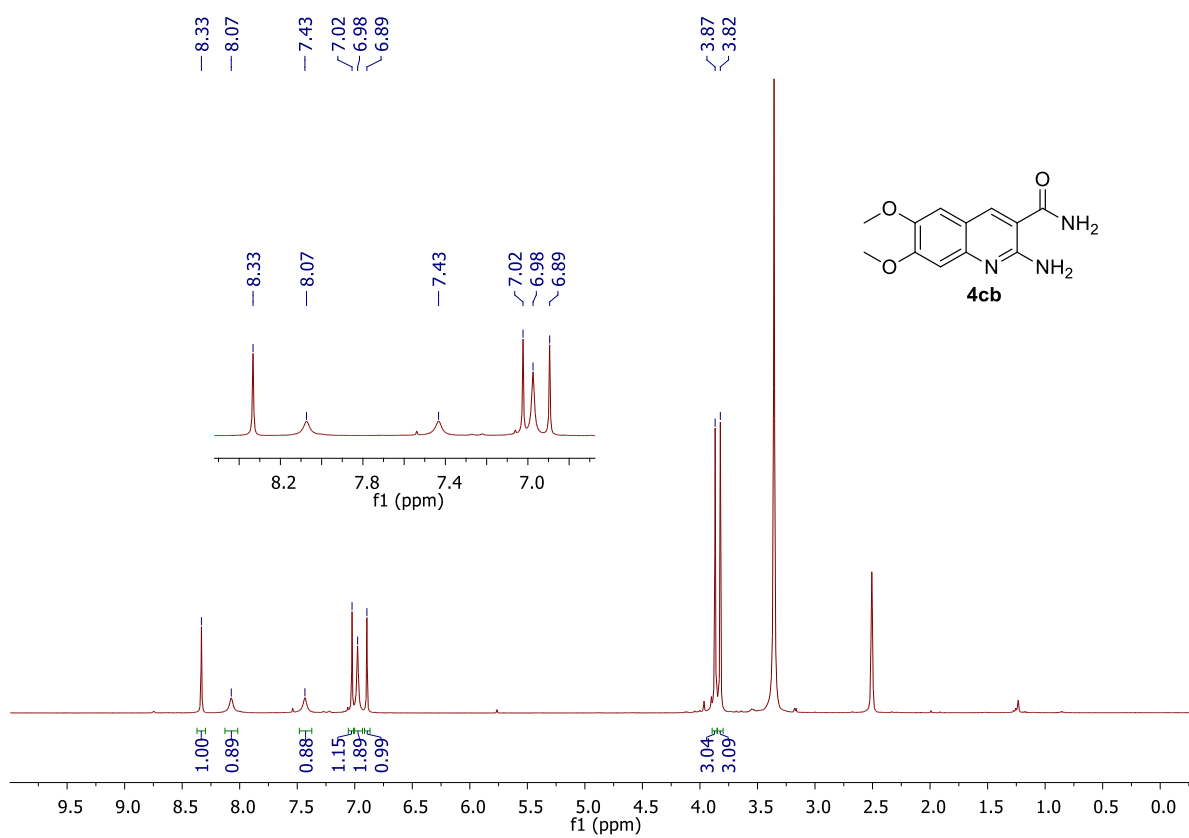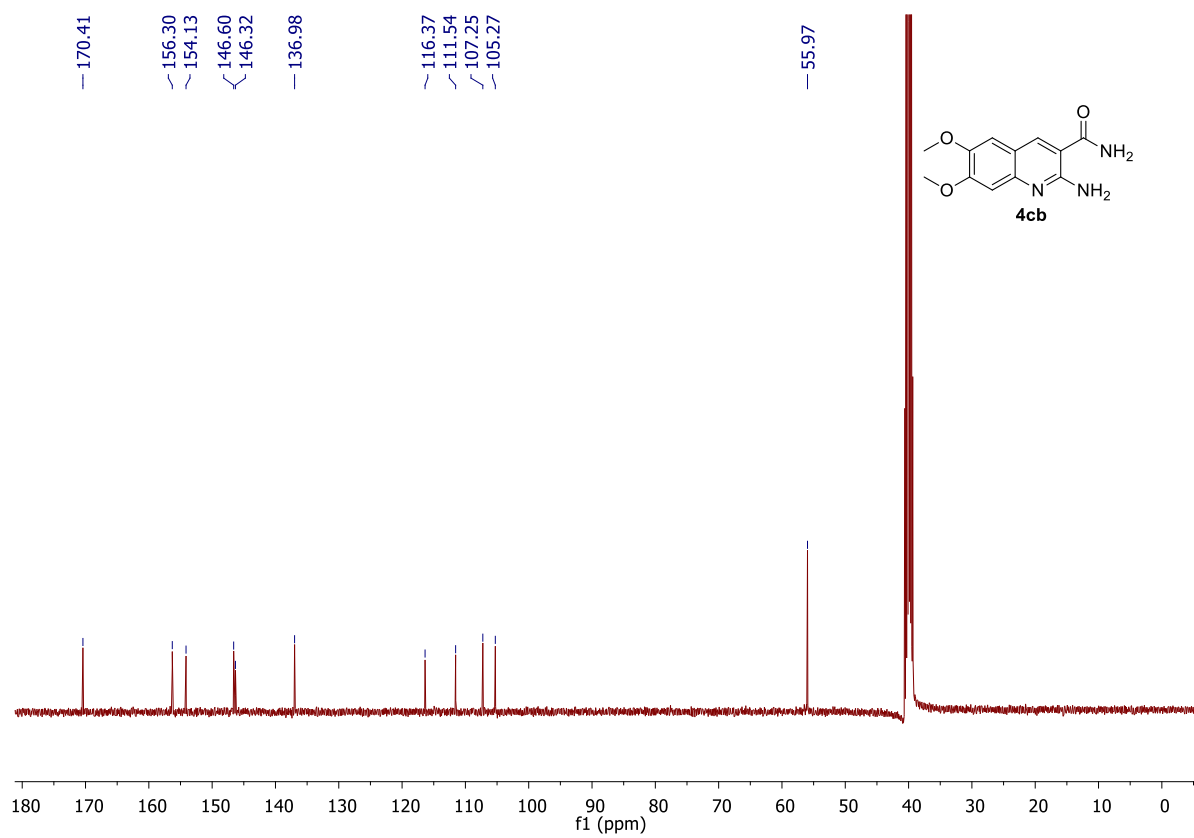





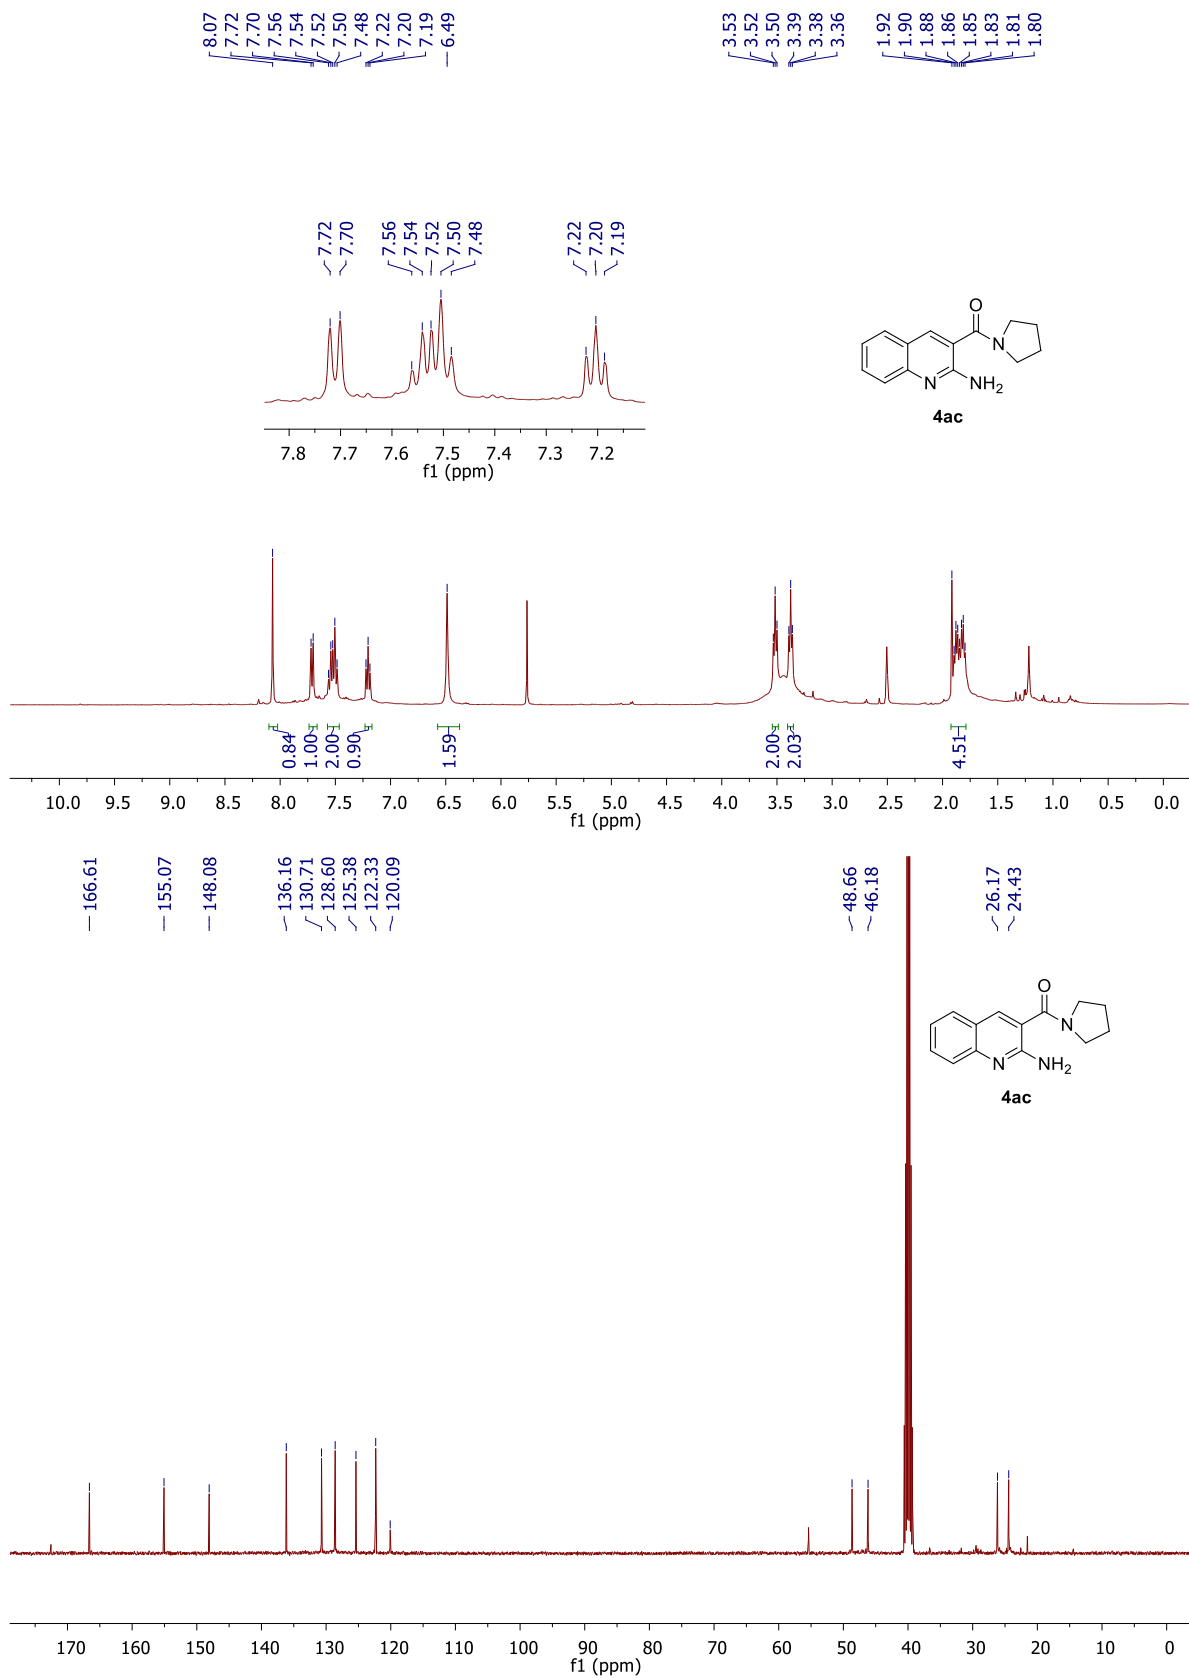

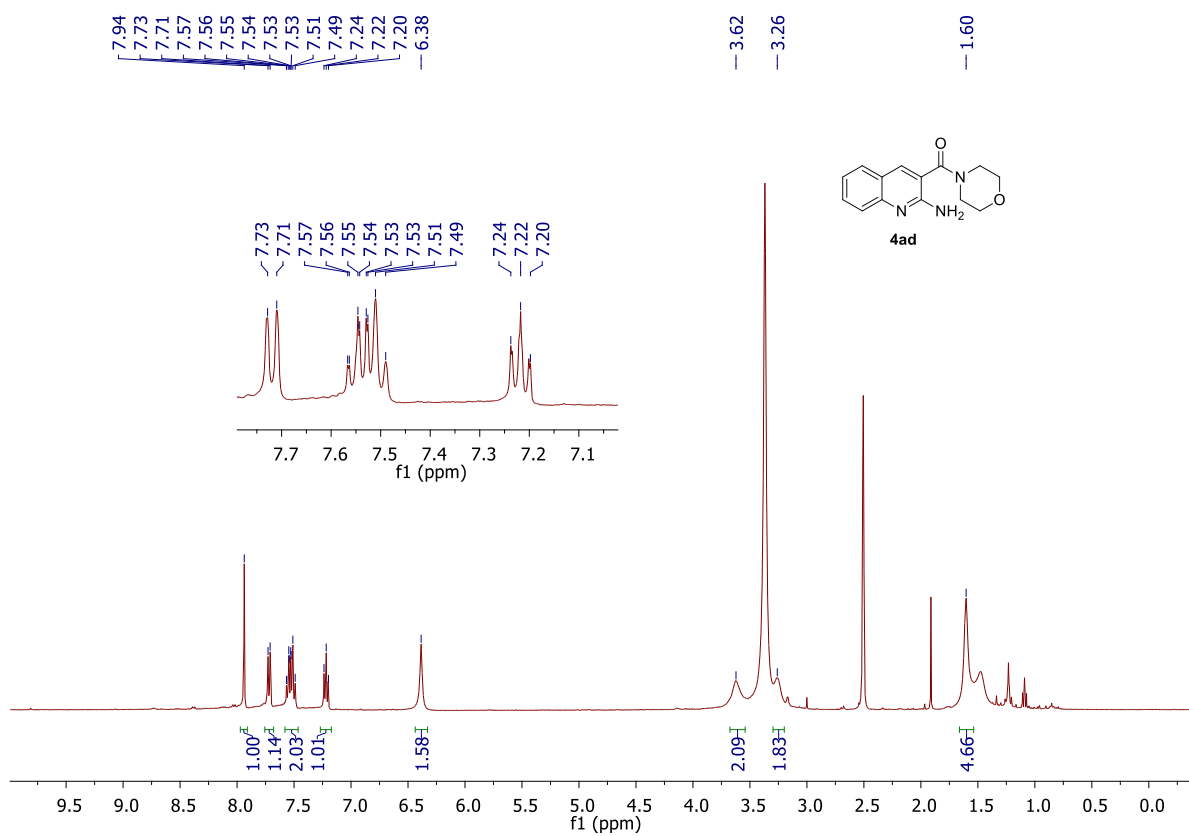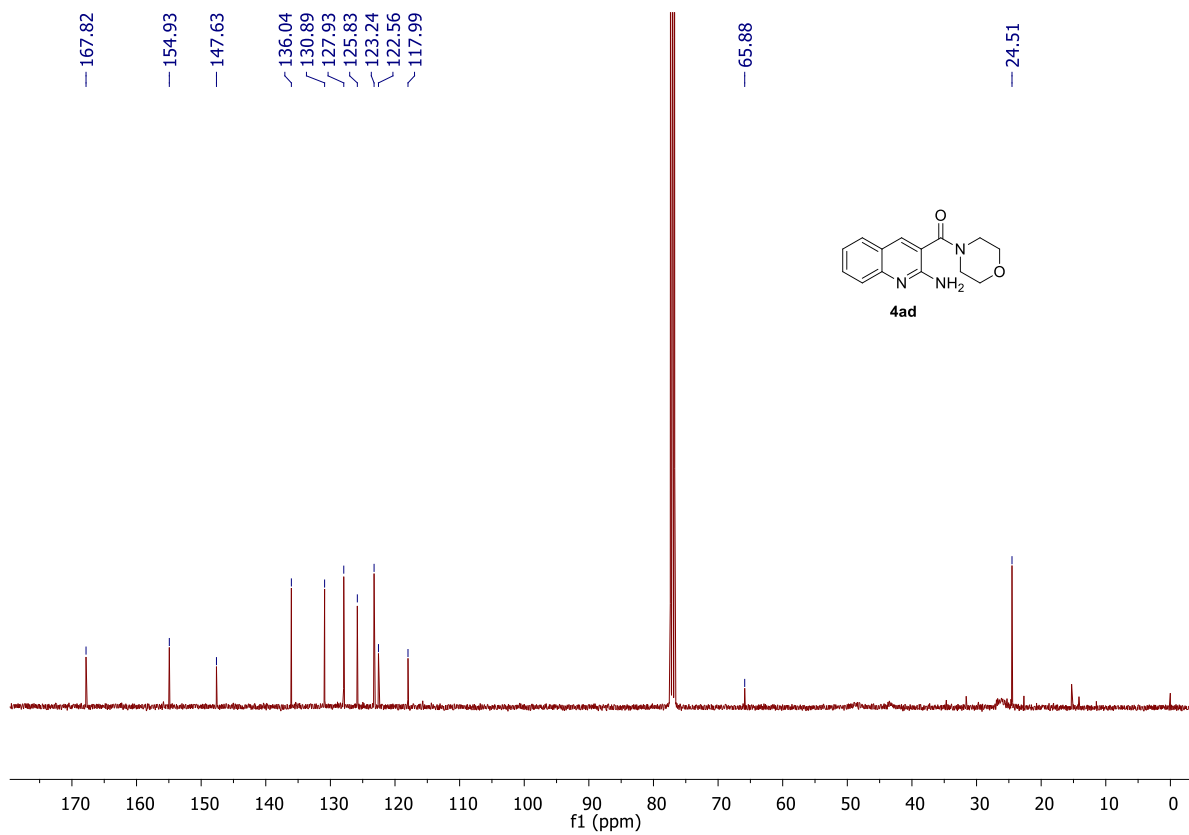



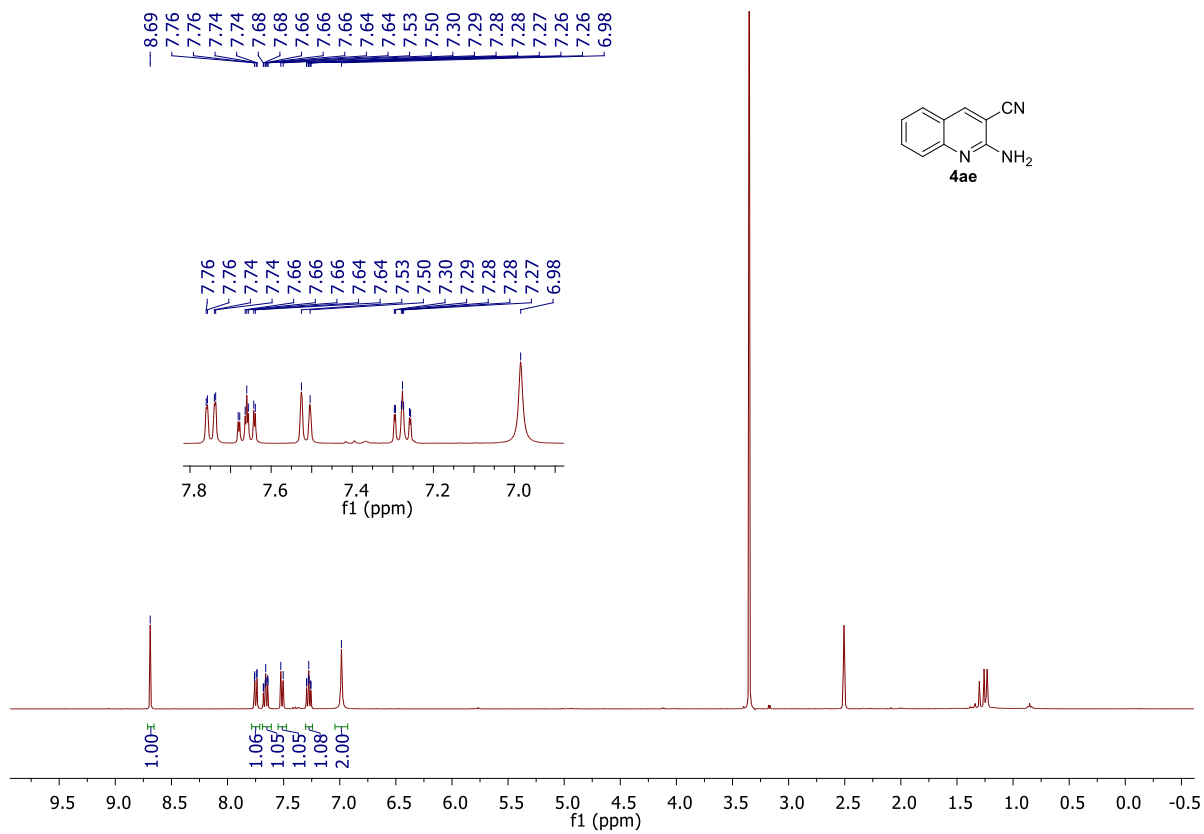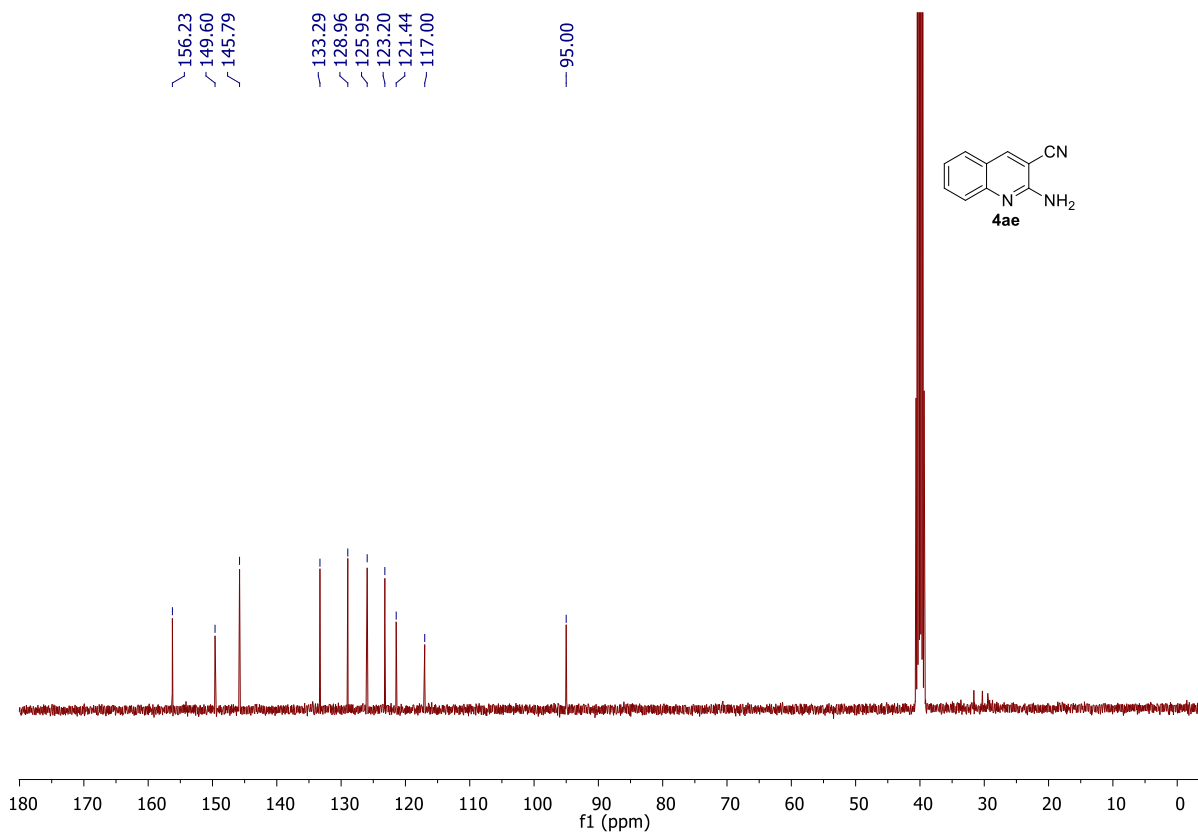

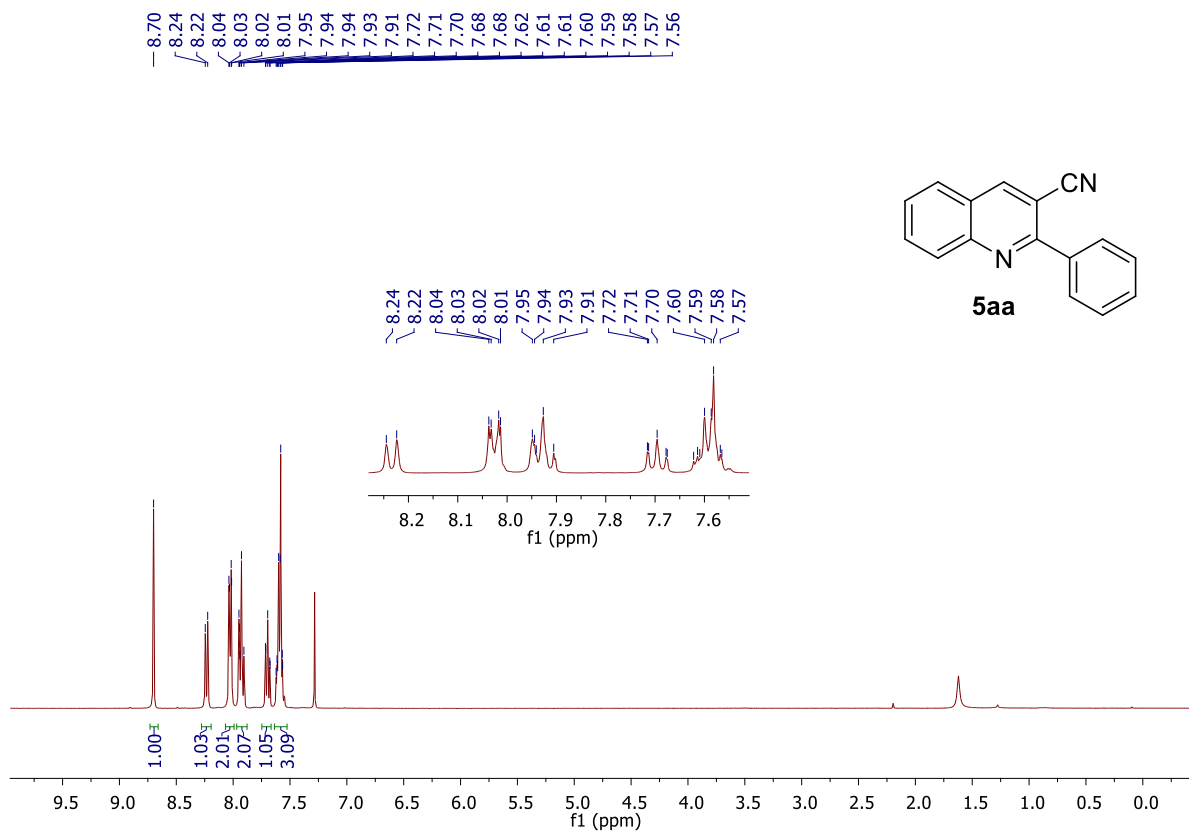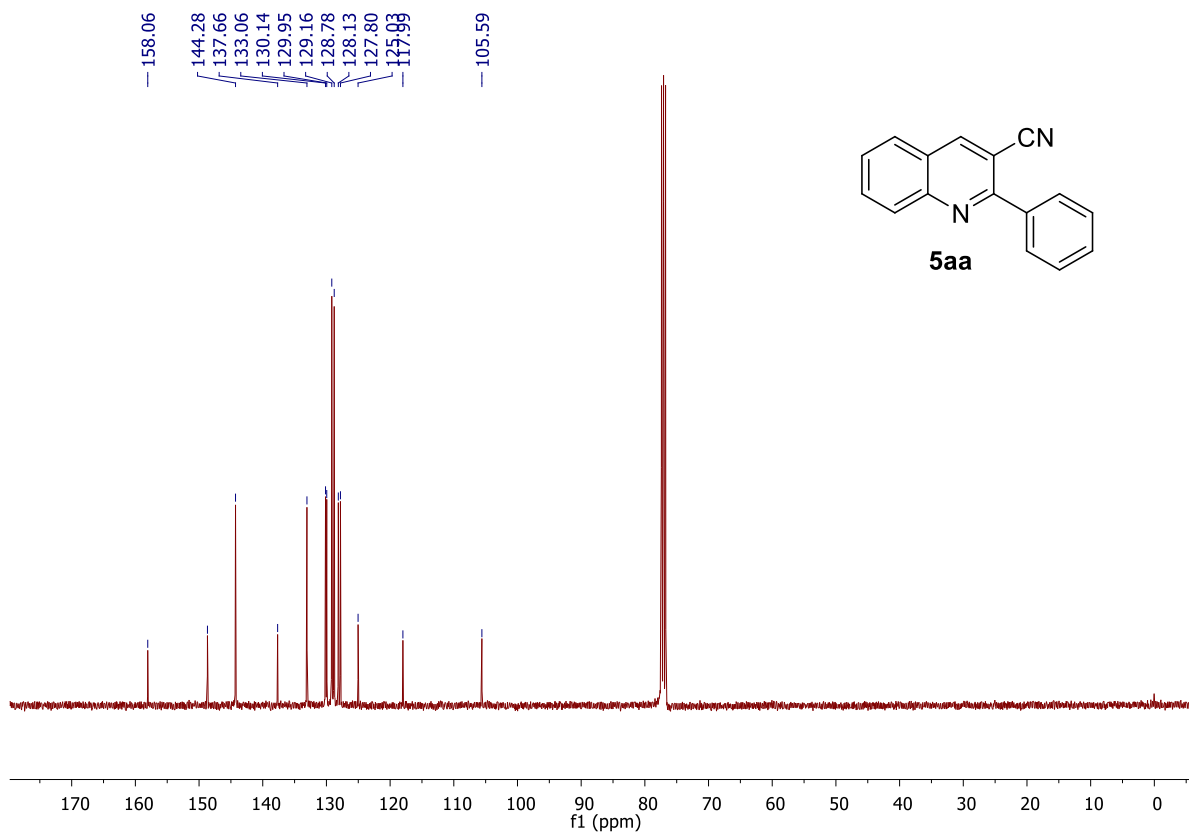

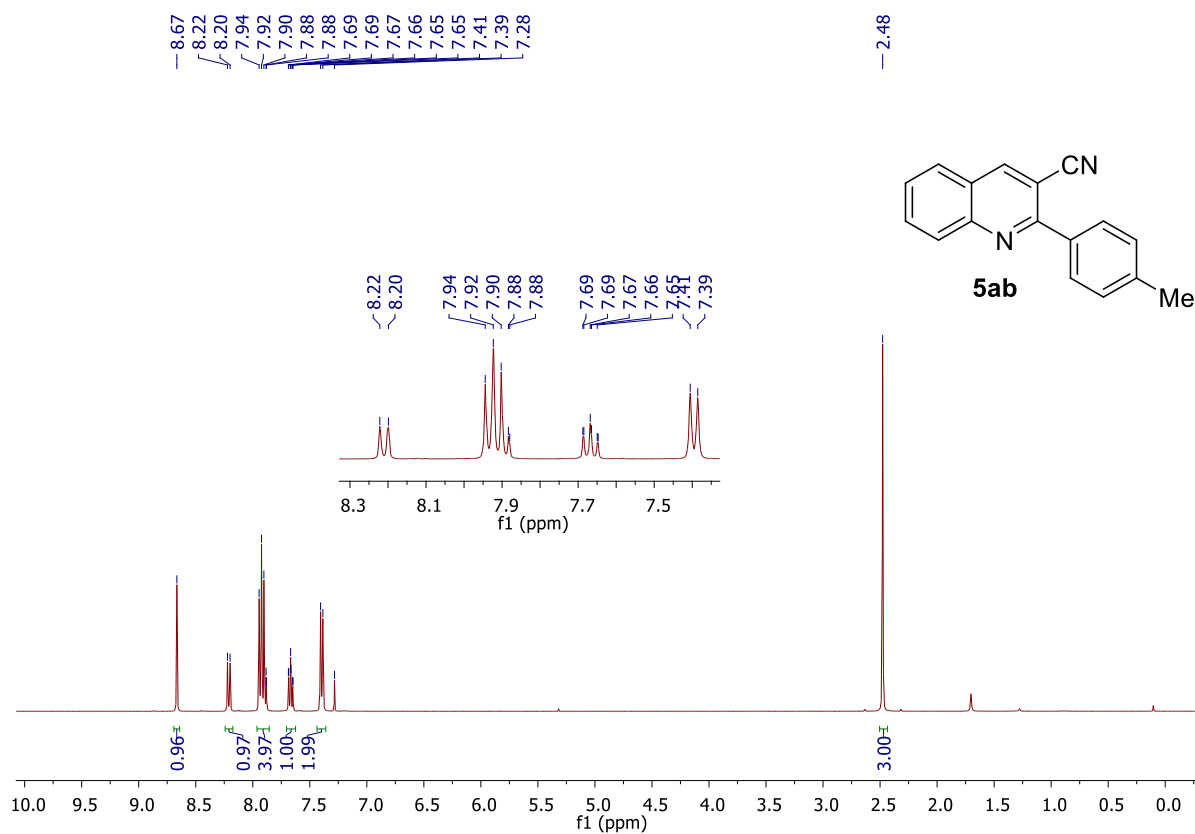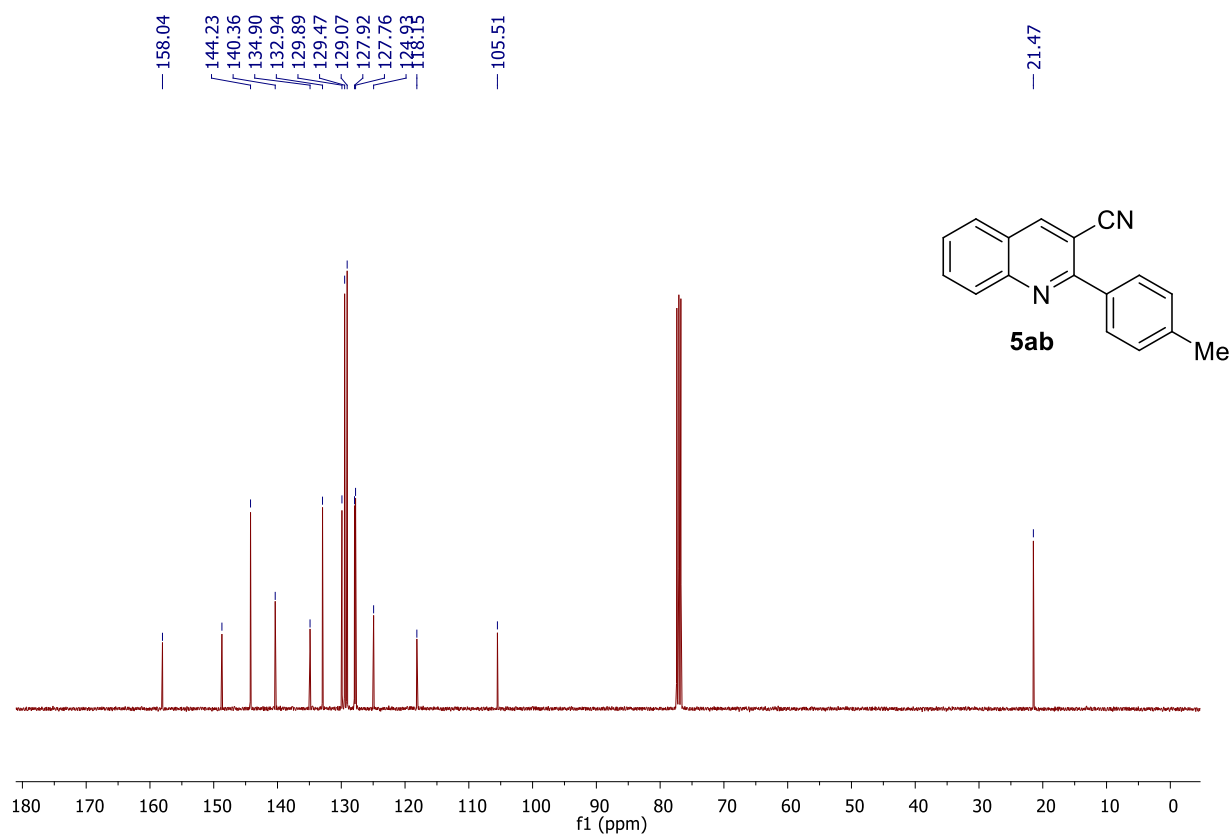



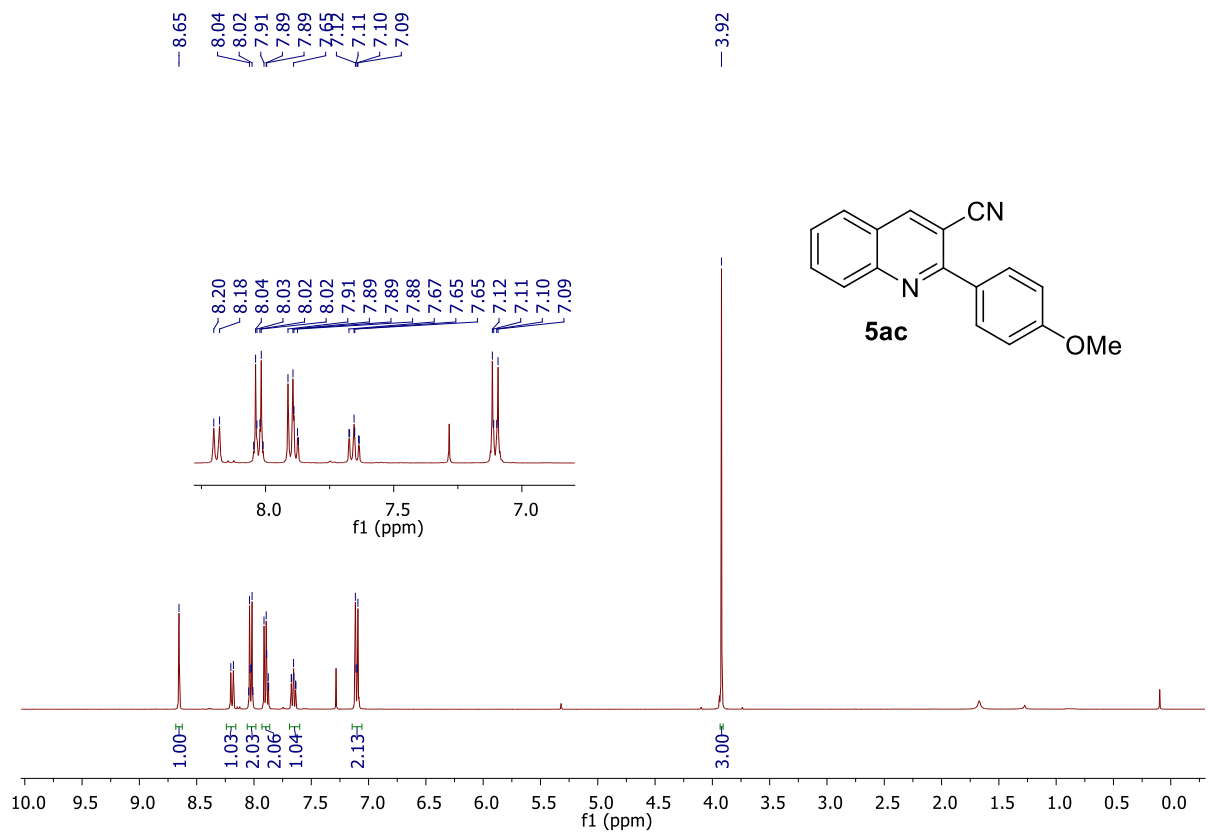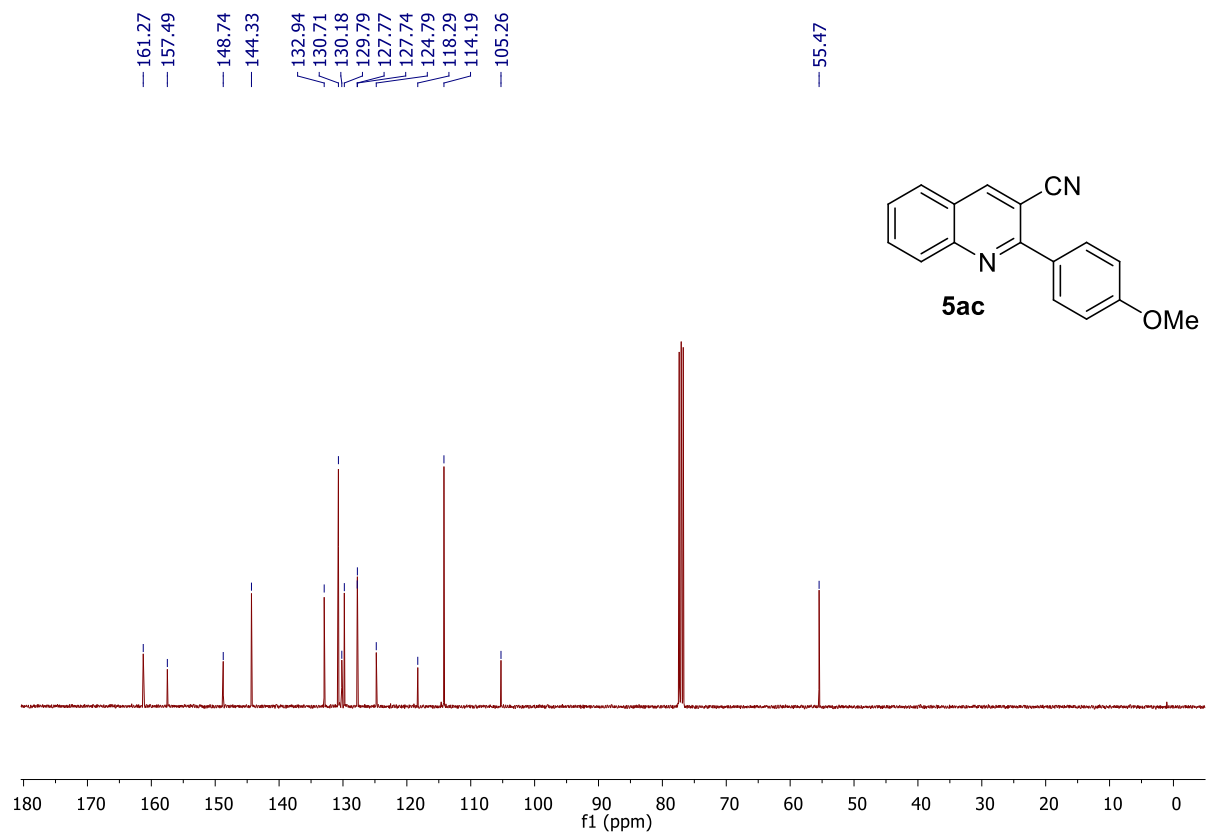



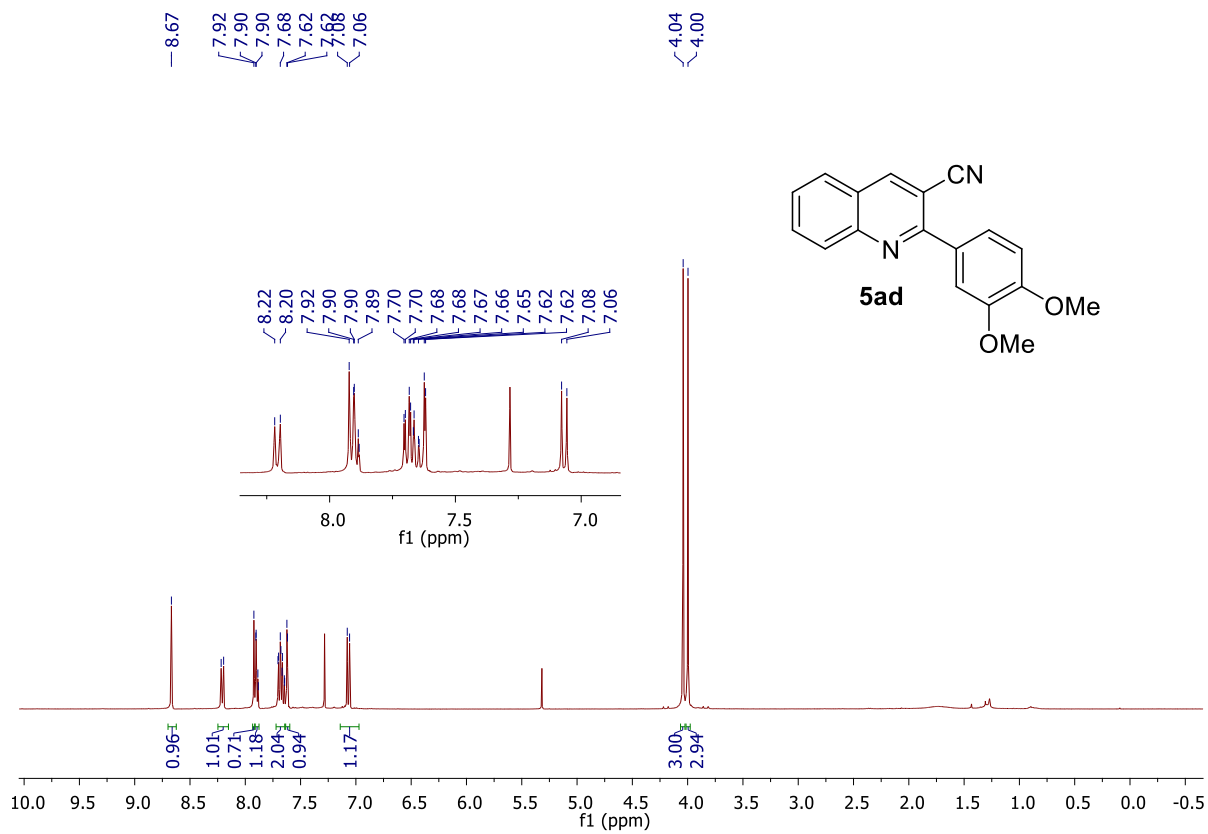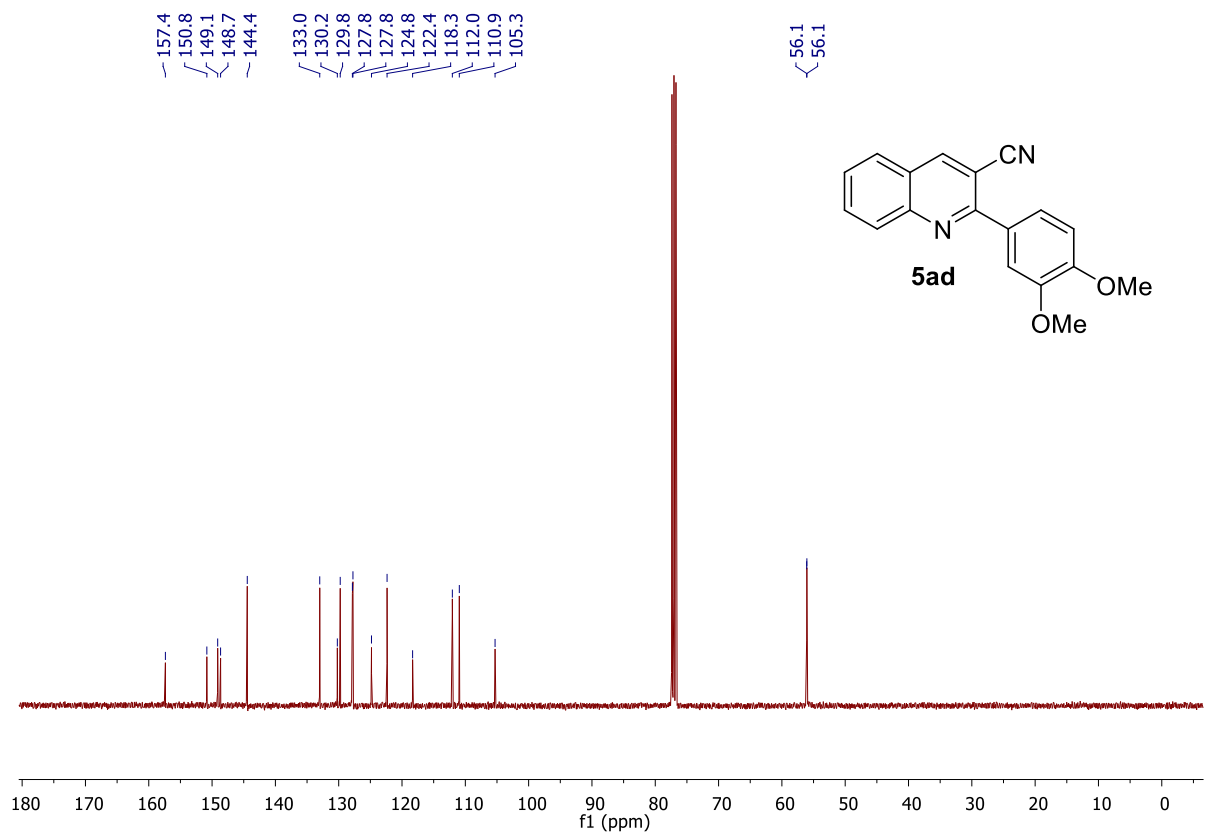

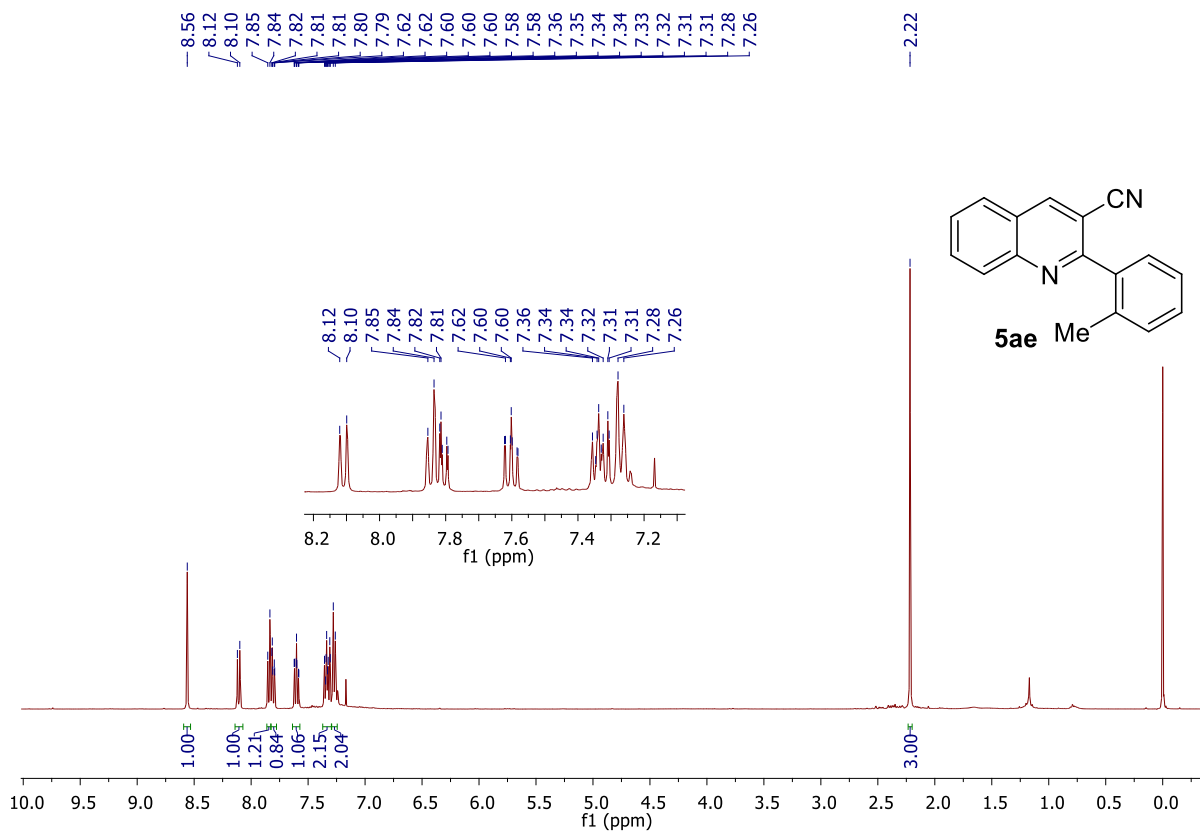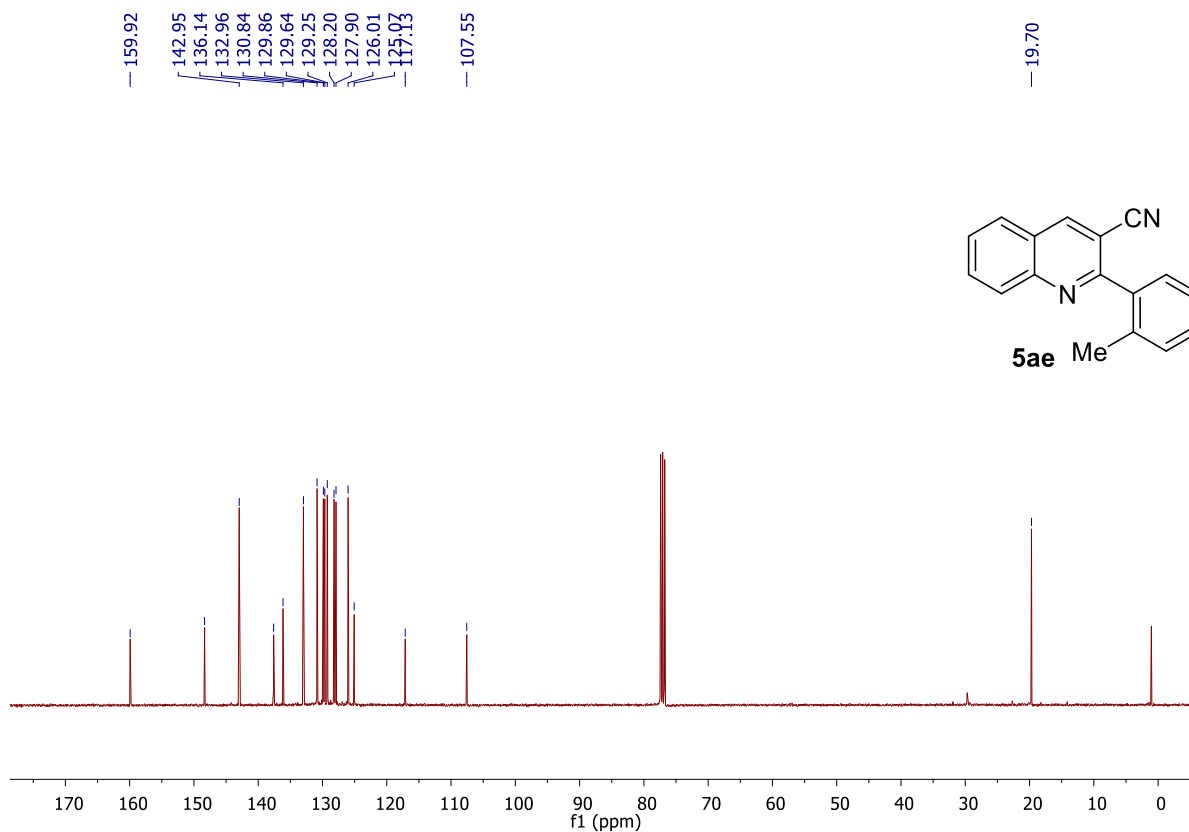

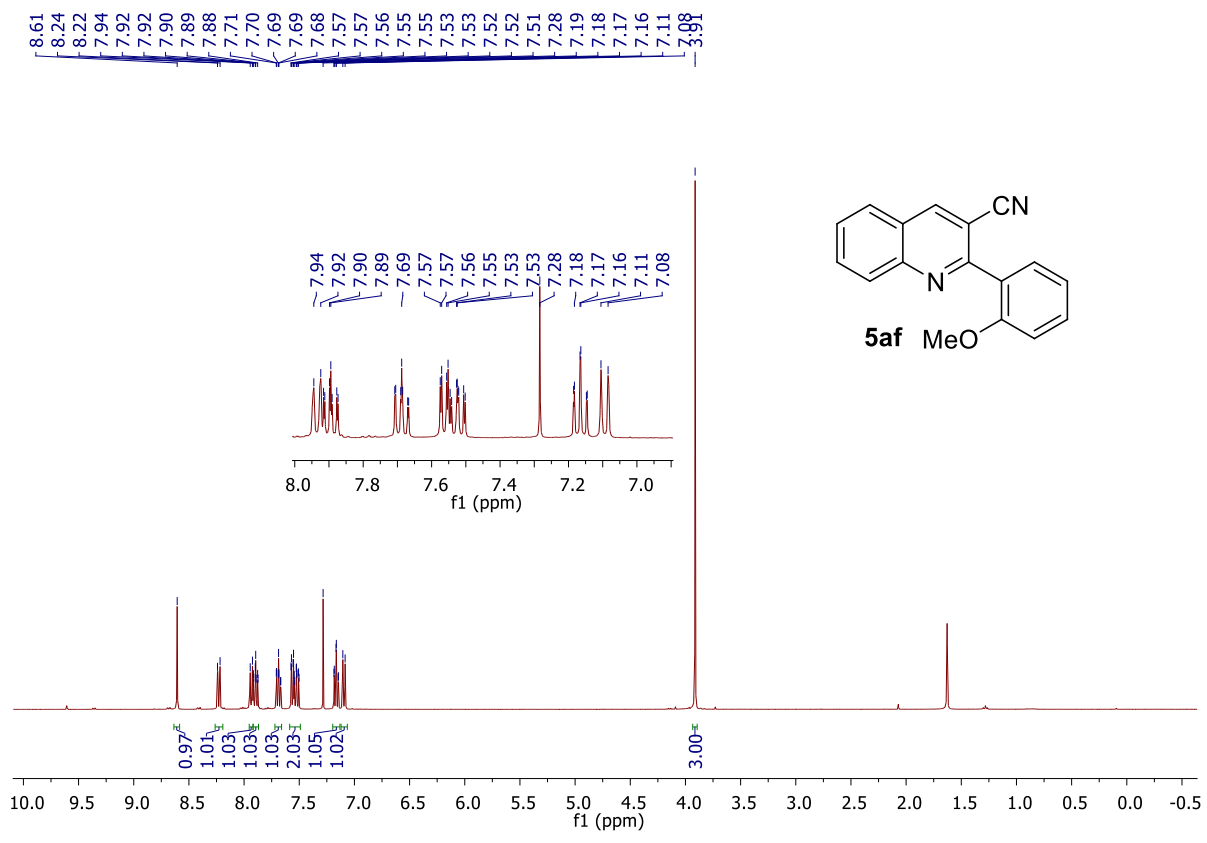

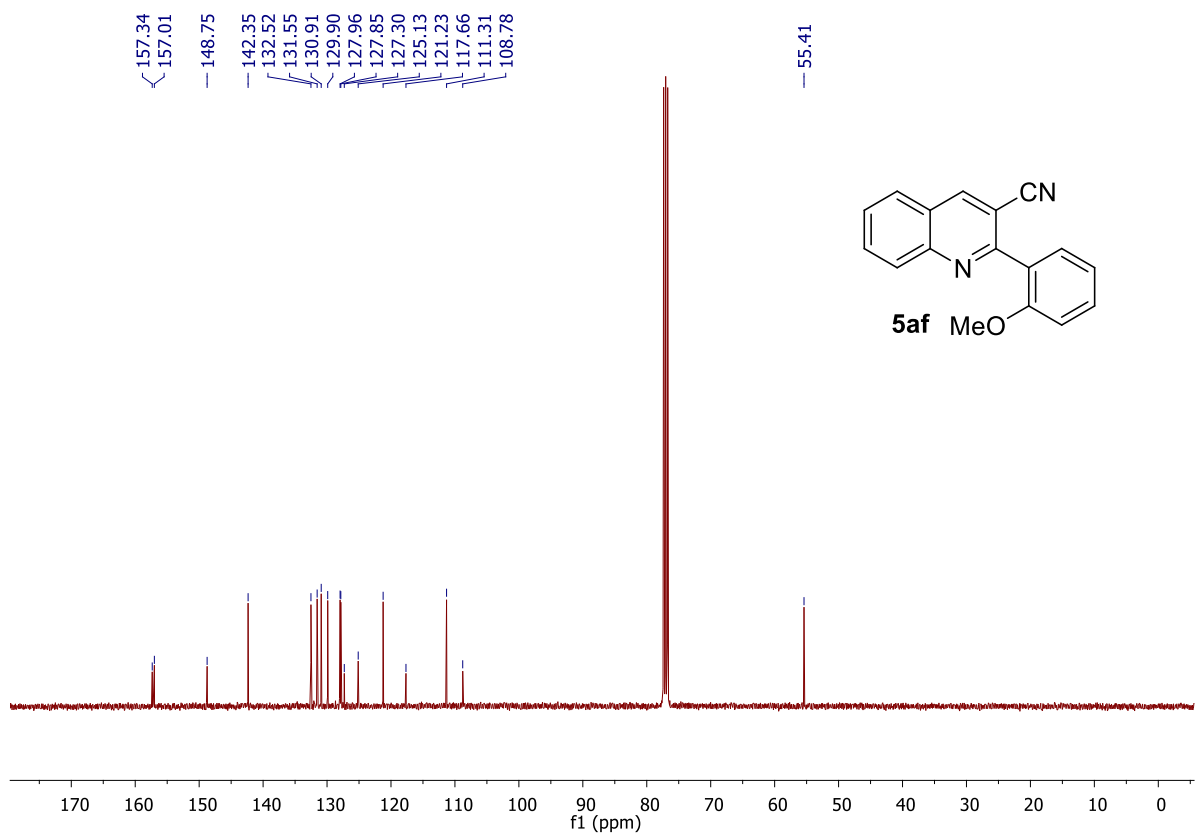

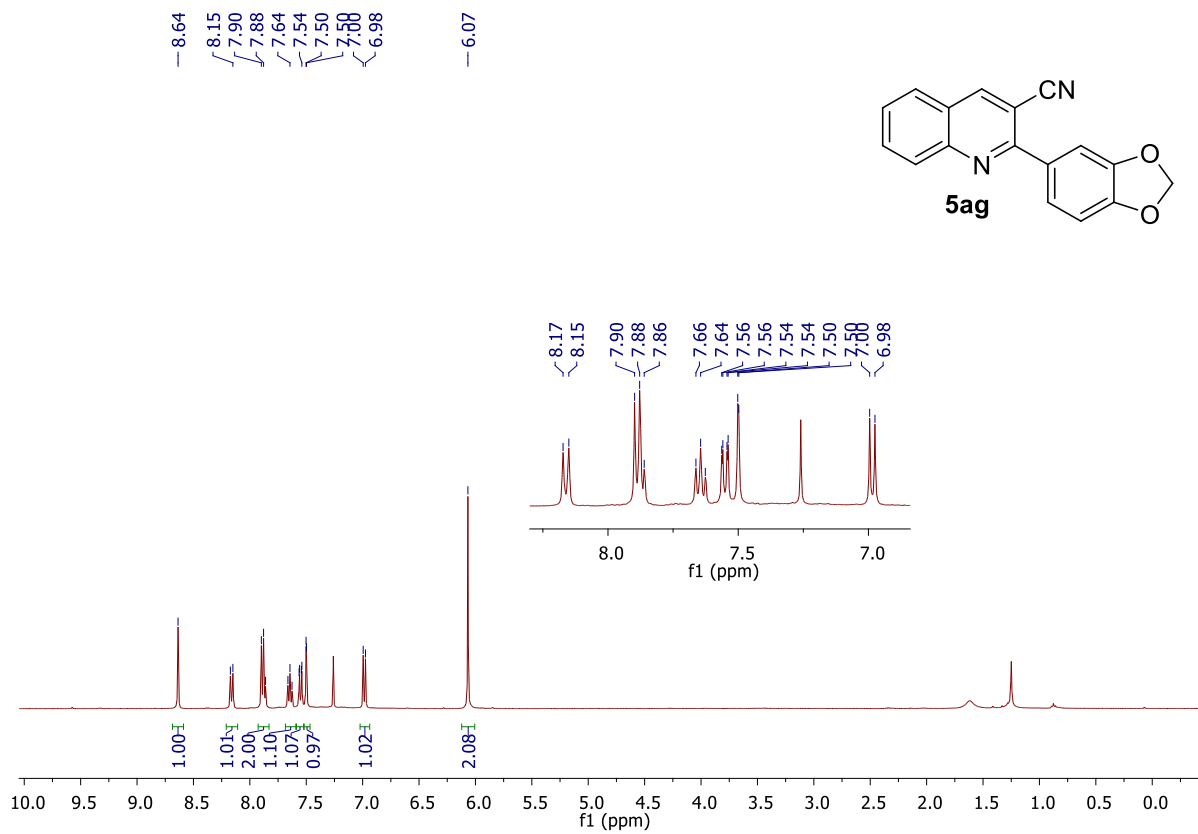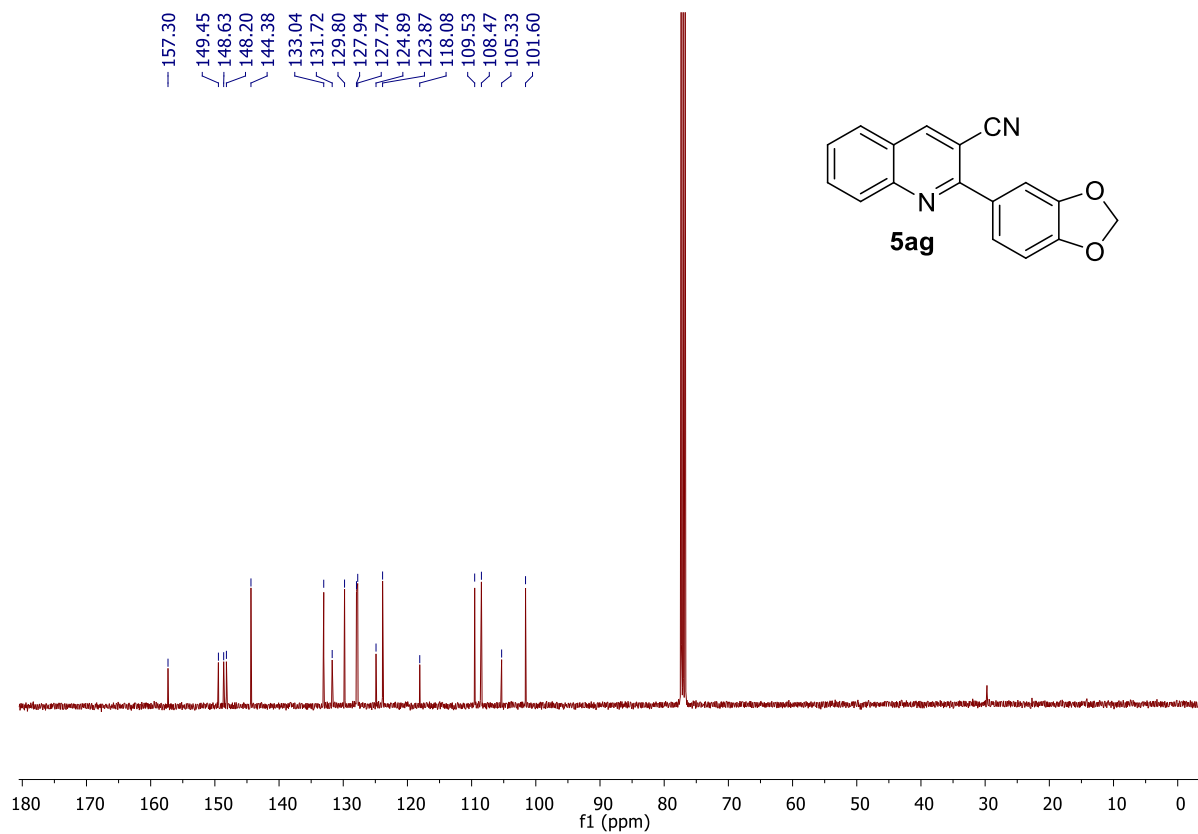

8.69  
8.22  
8.20  
8.00  
7.98  
7.95  
7.93  
7.91  
7.72  
7.70  
7.68  
7.57  
7.55

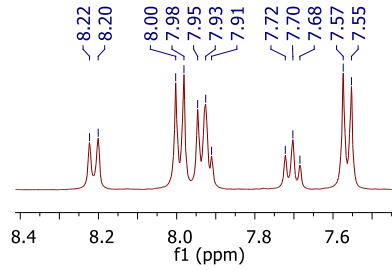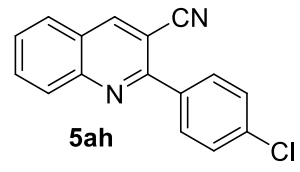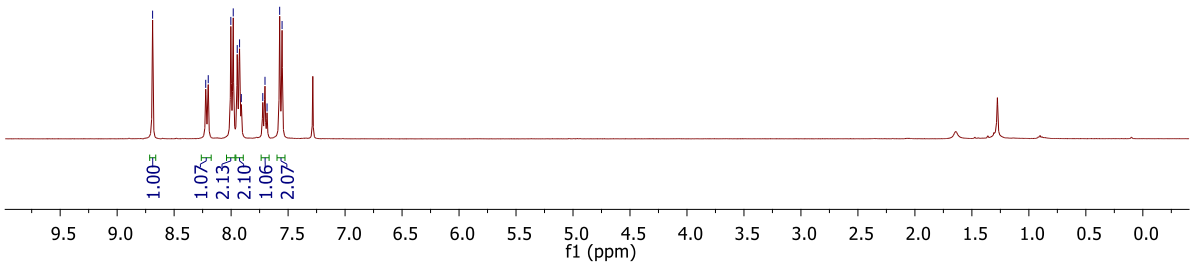

156.69  
148.65  
144.34  
133.20  
130.53  
129.94  
129.01  
128.33  
127.80  
117.88  
105.28

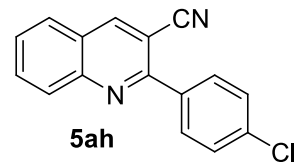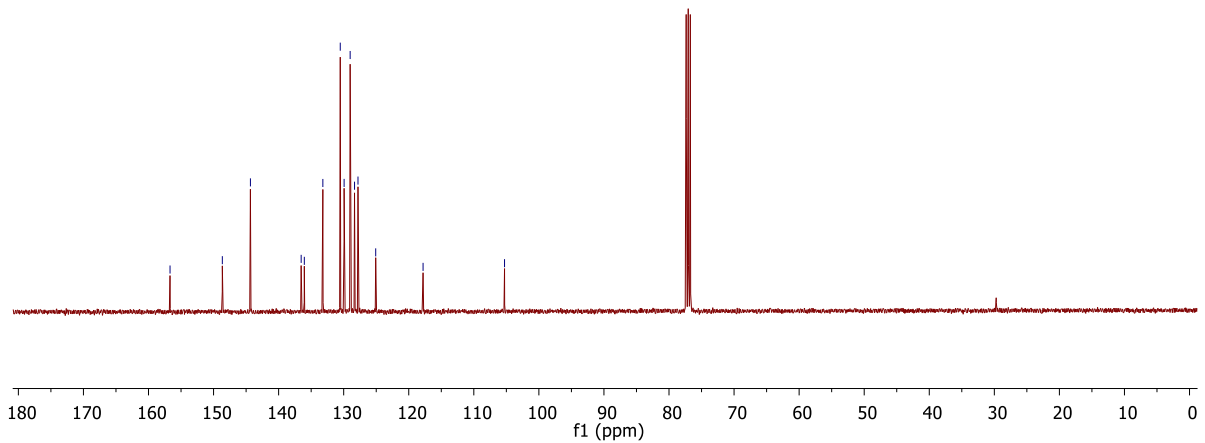

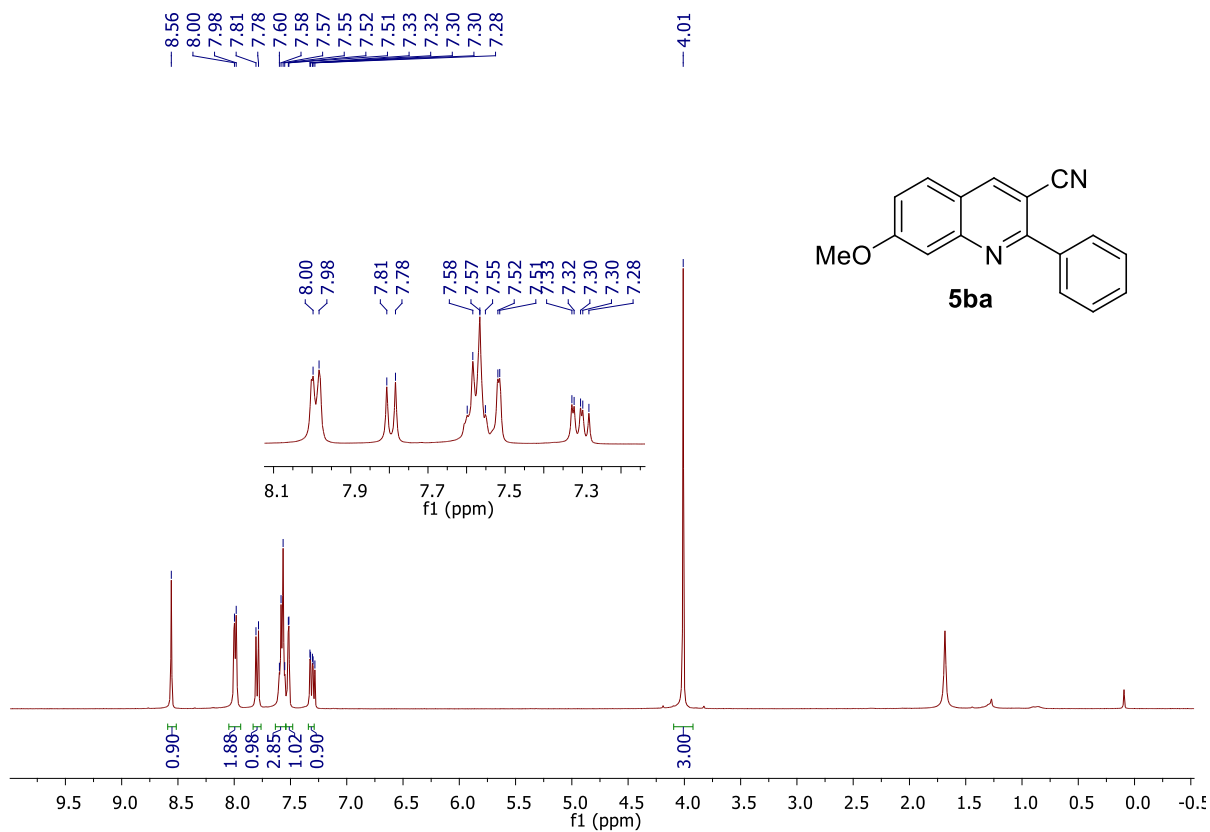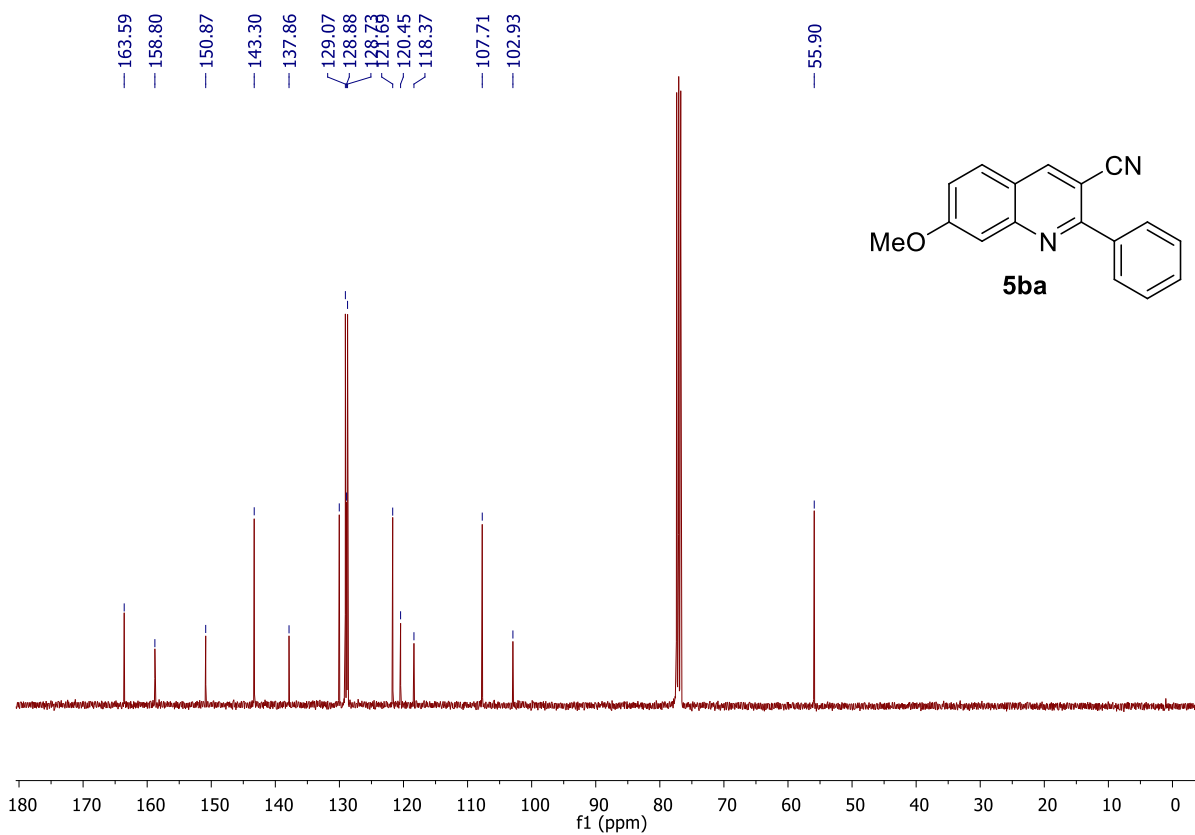

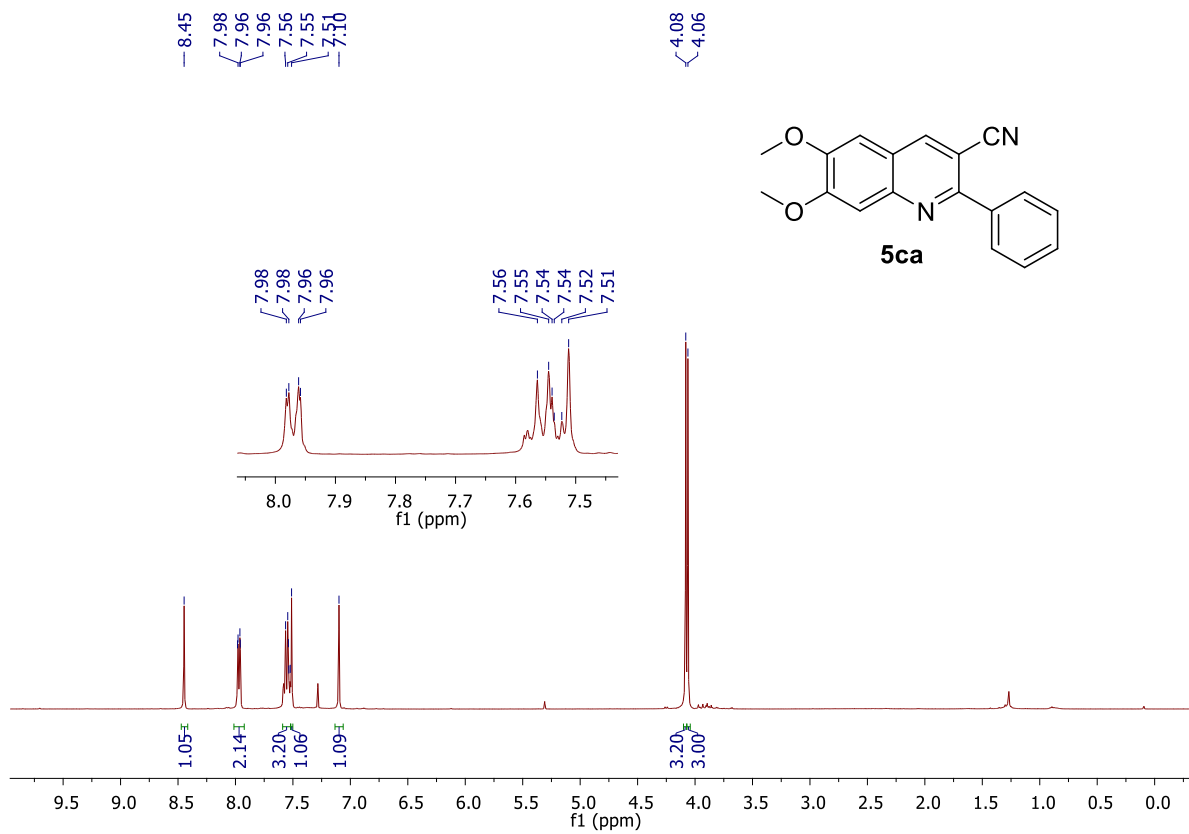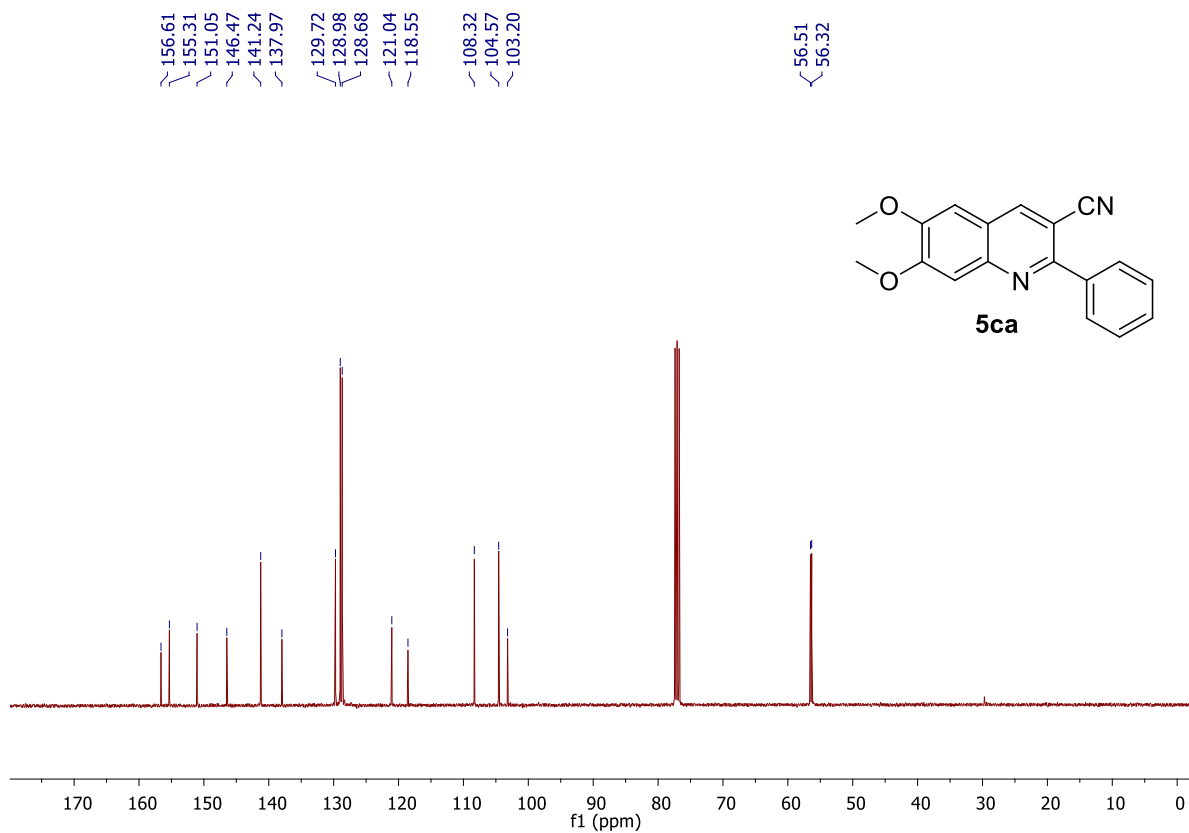



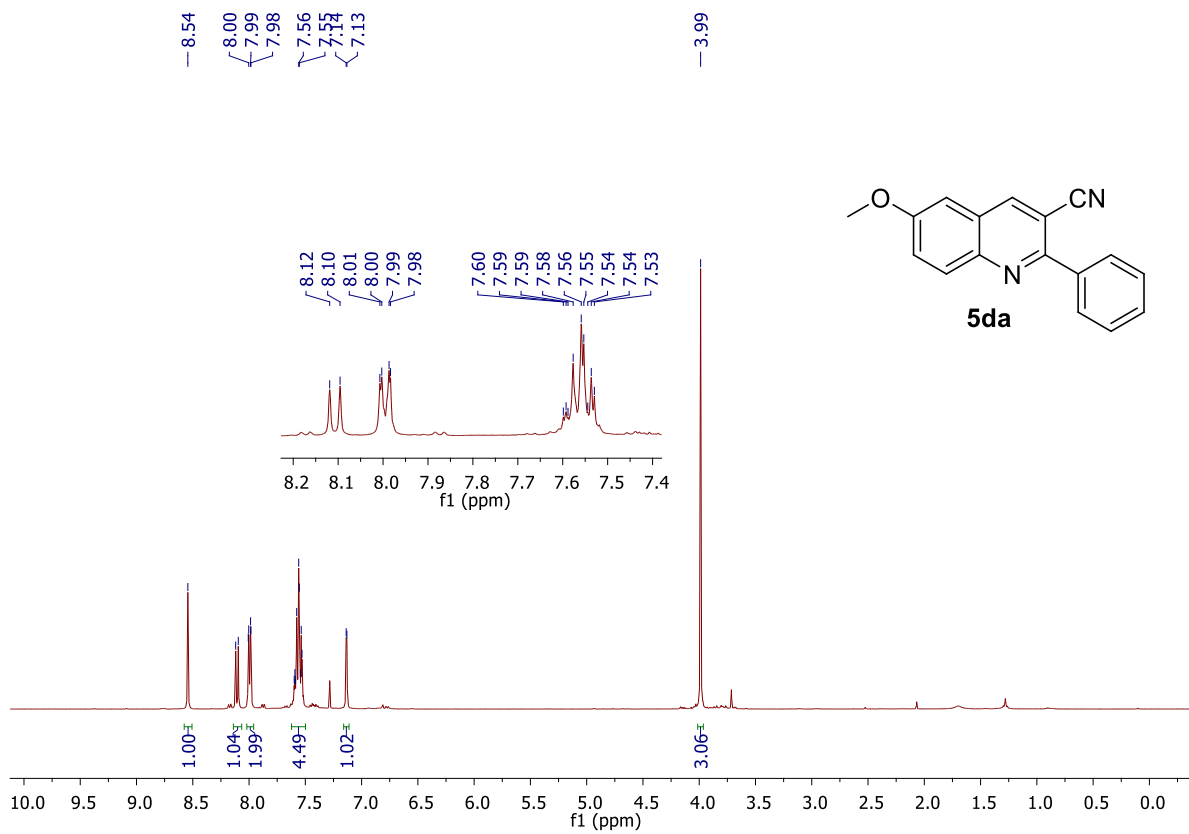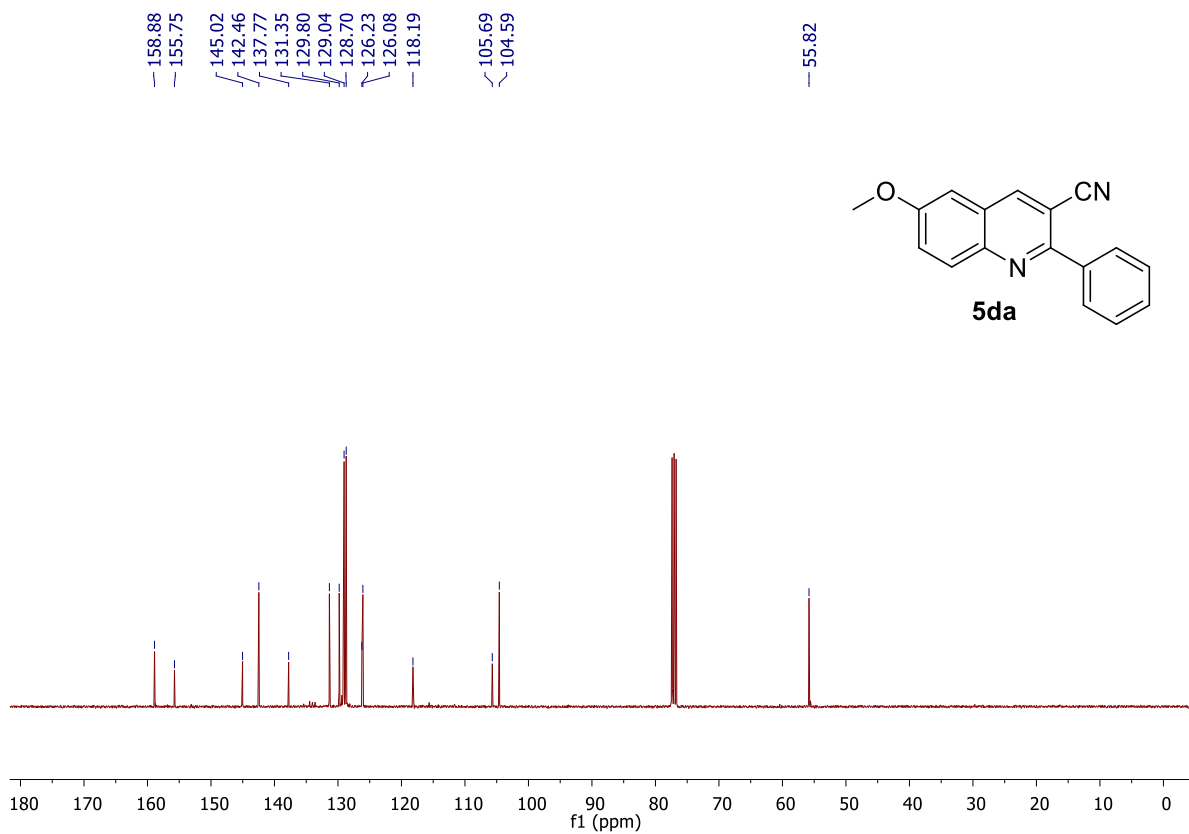

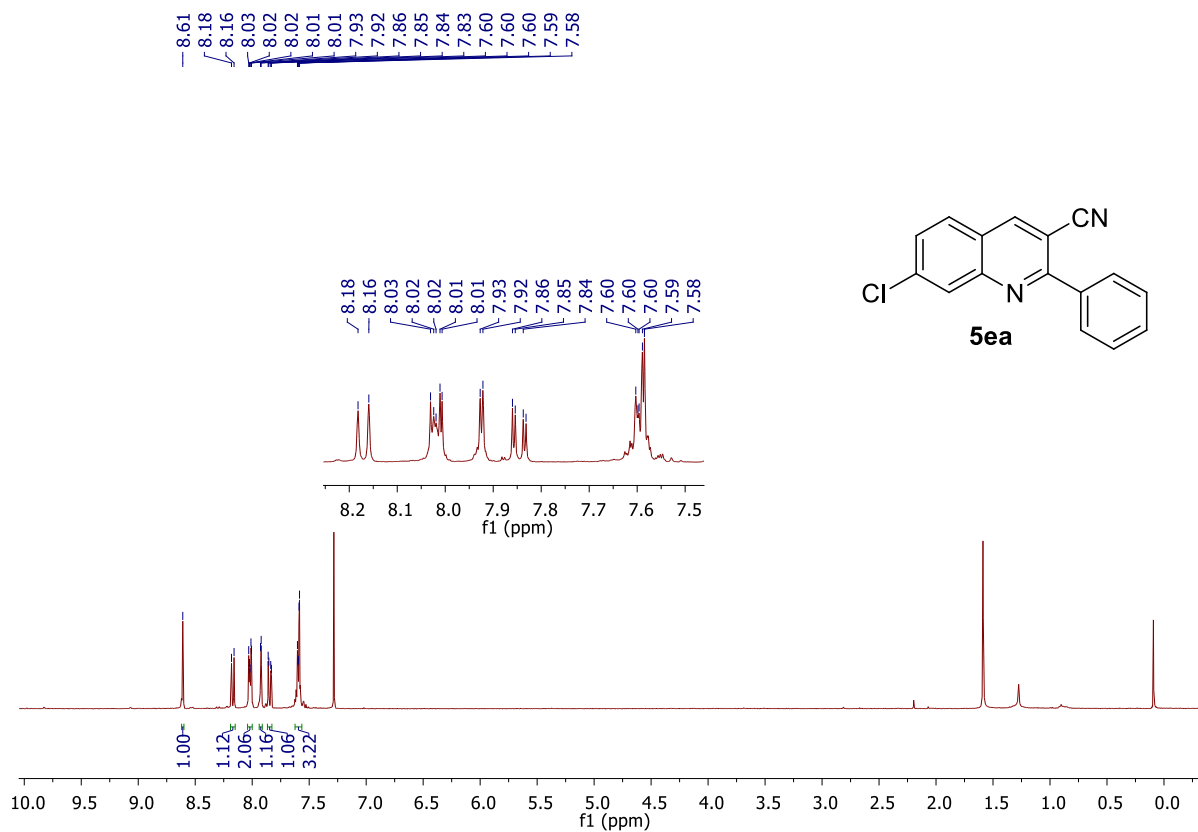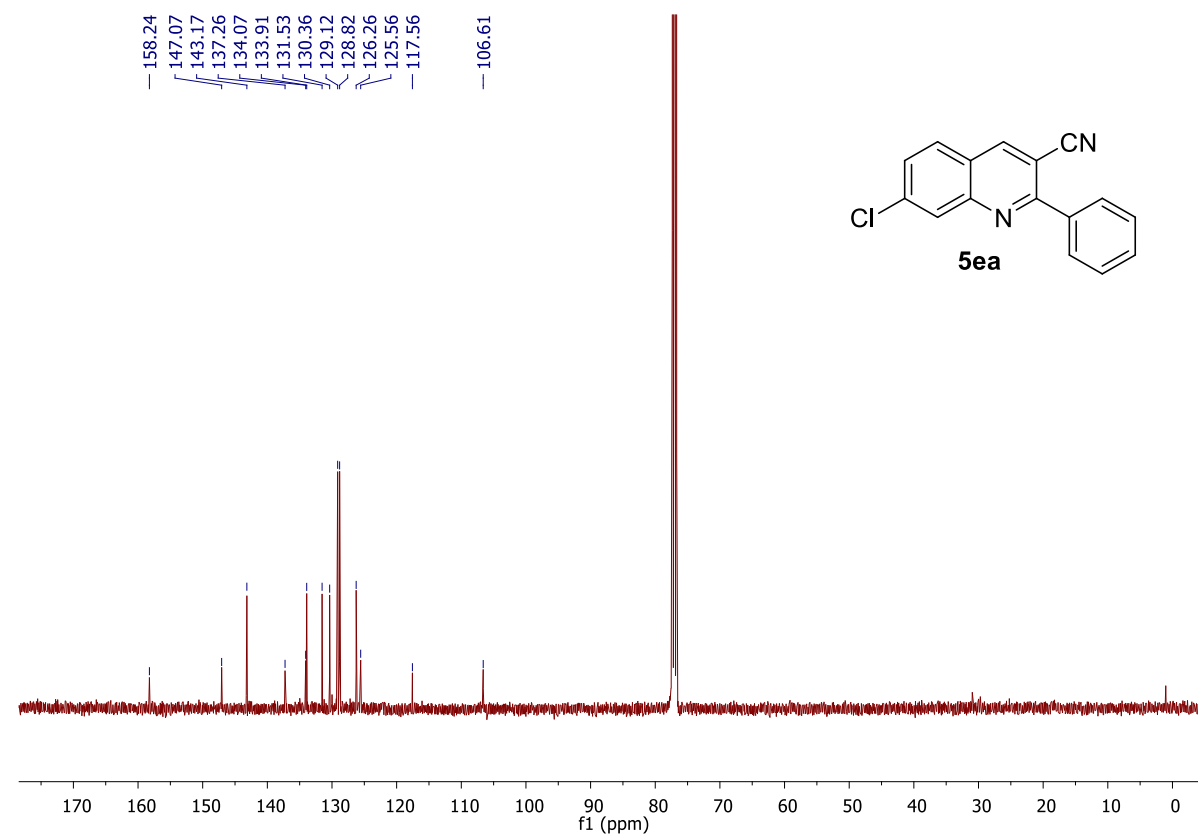

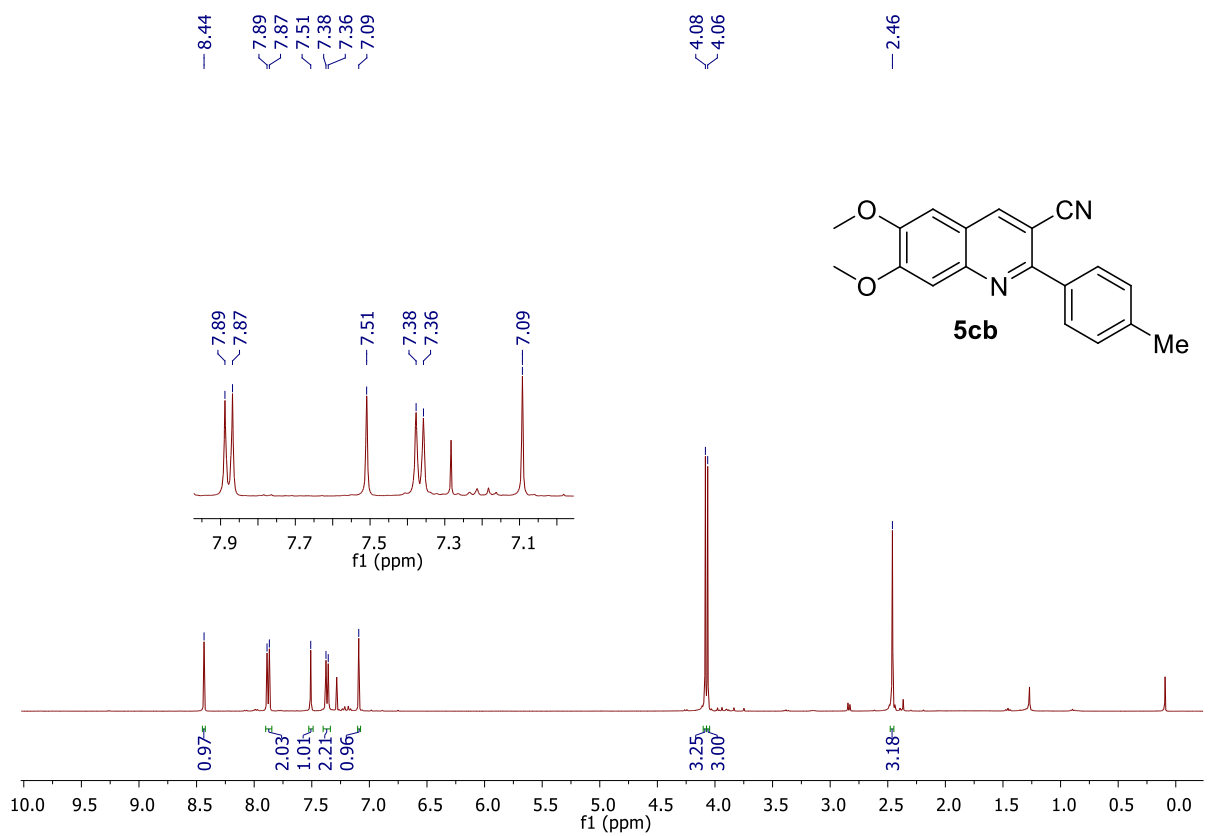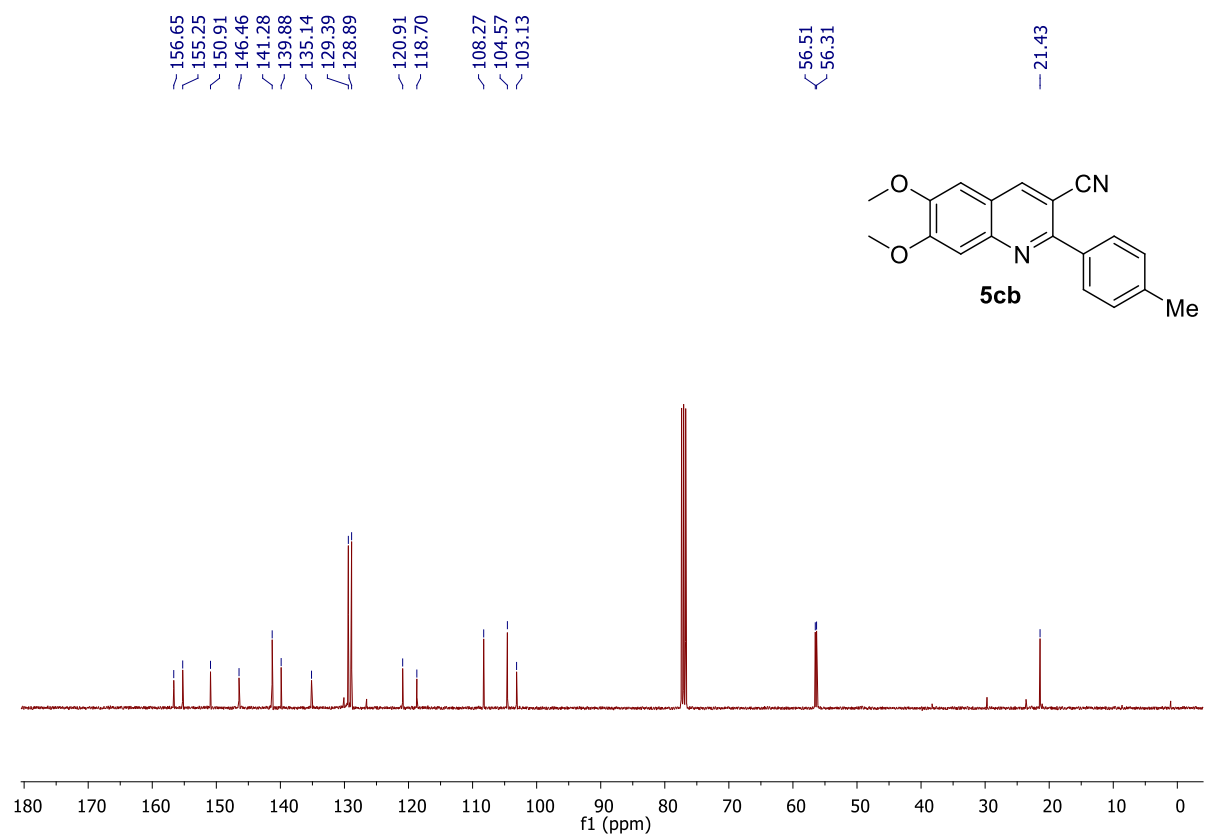

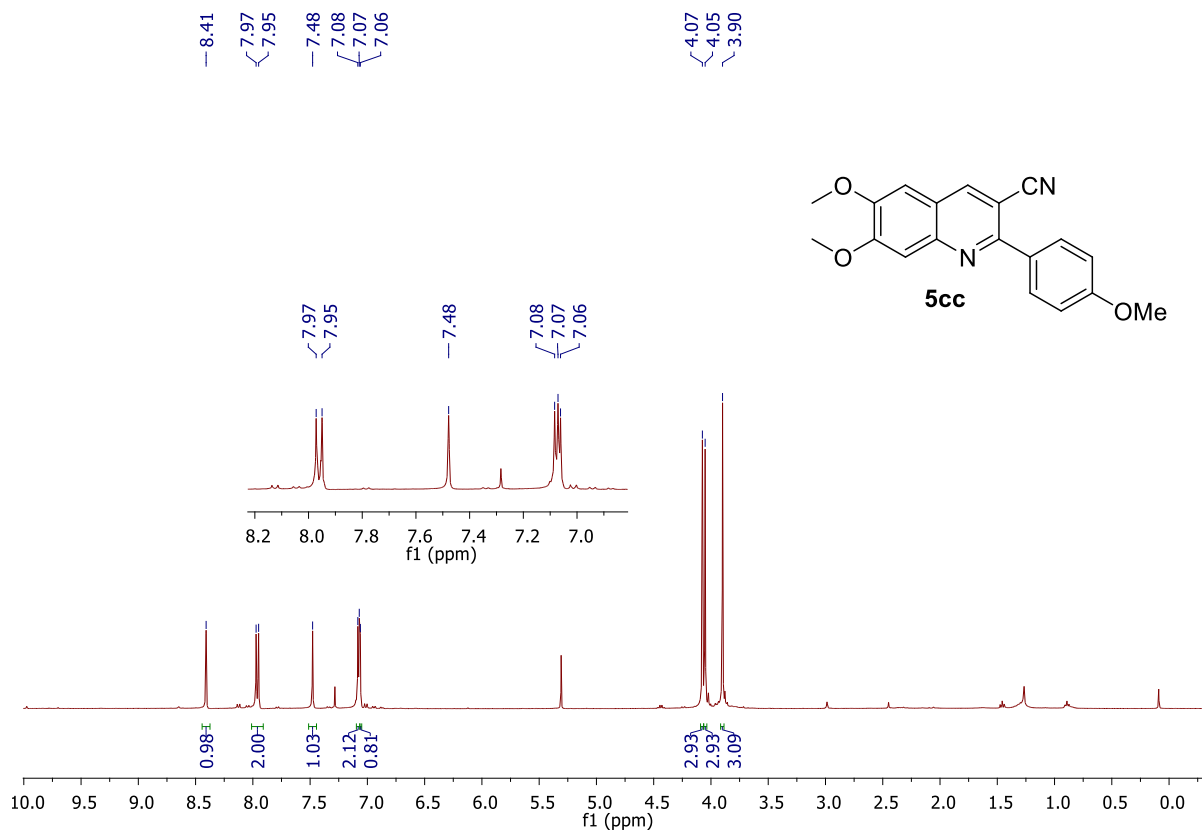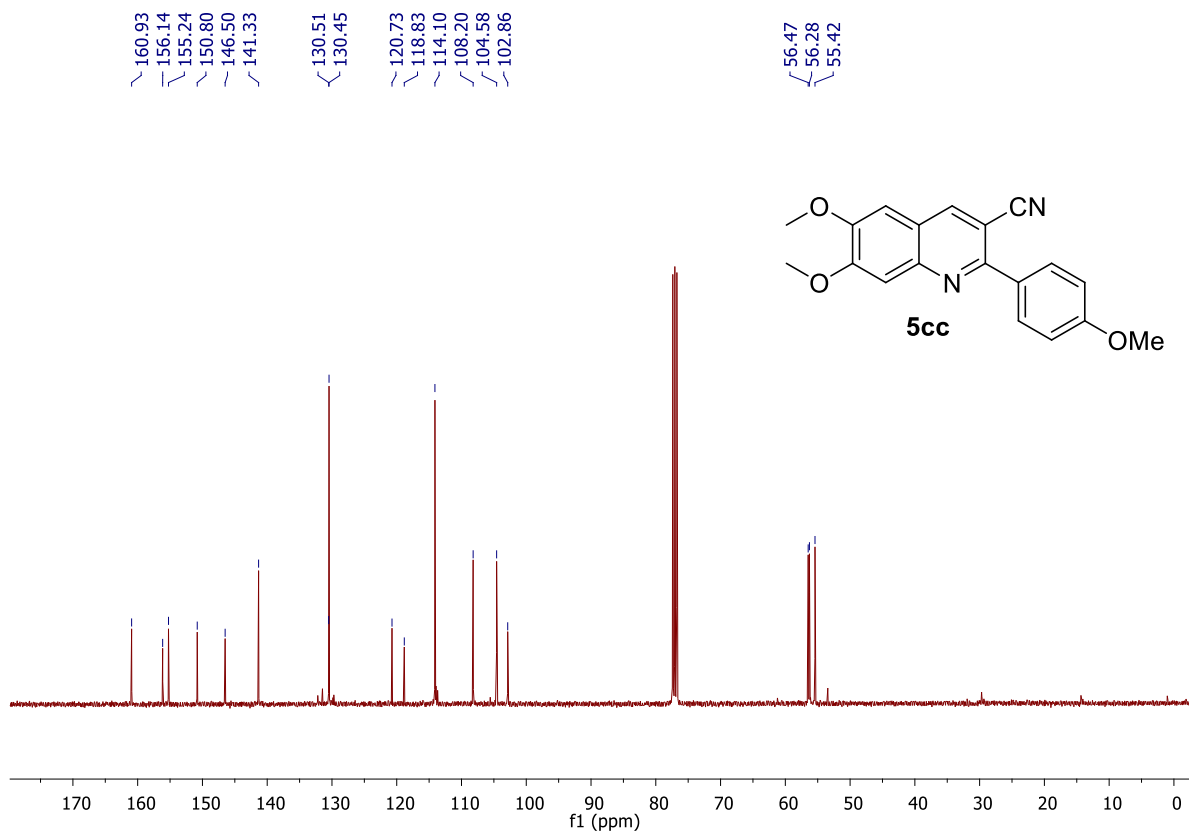

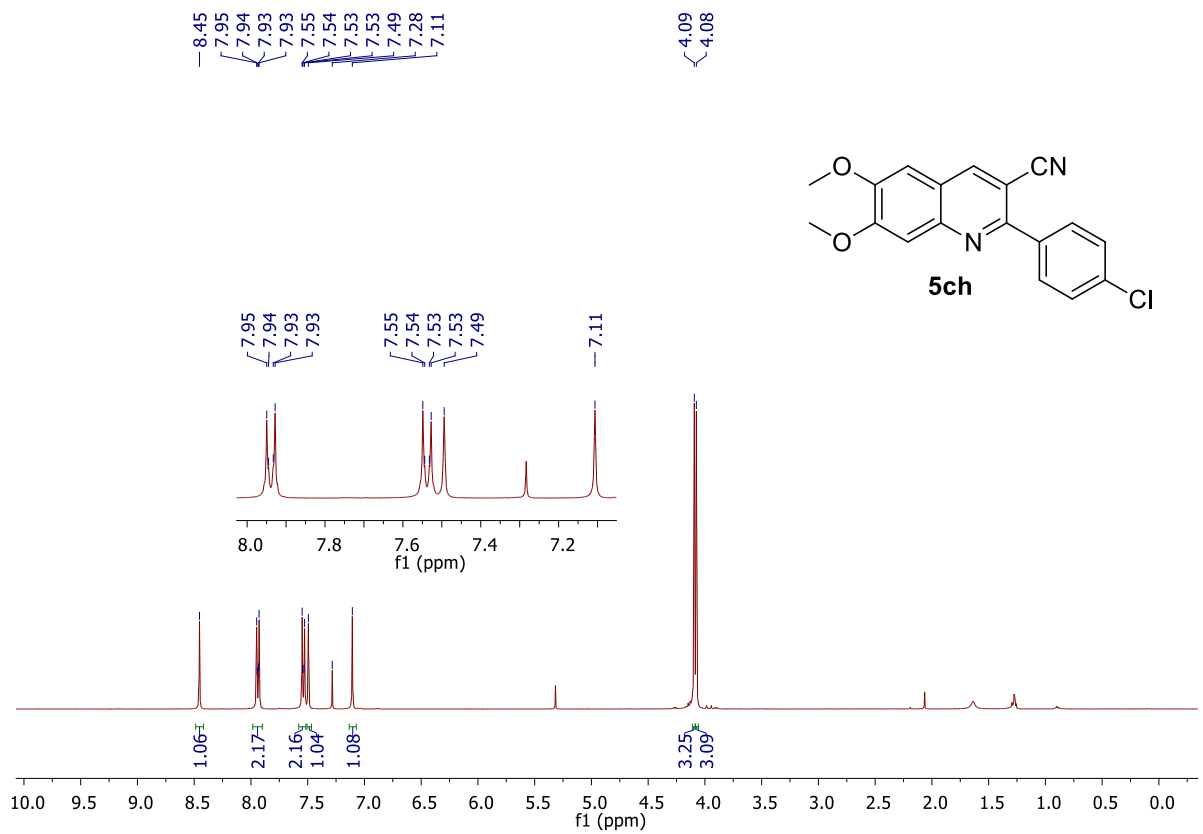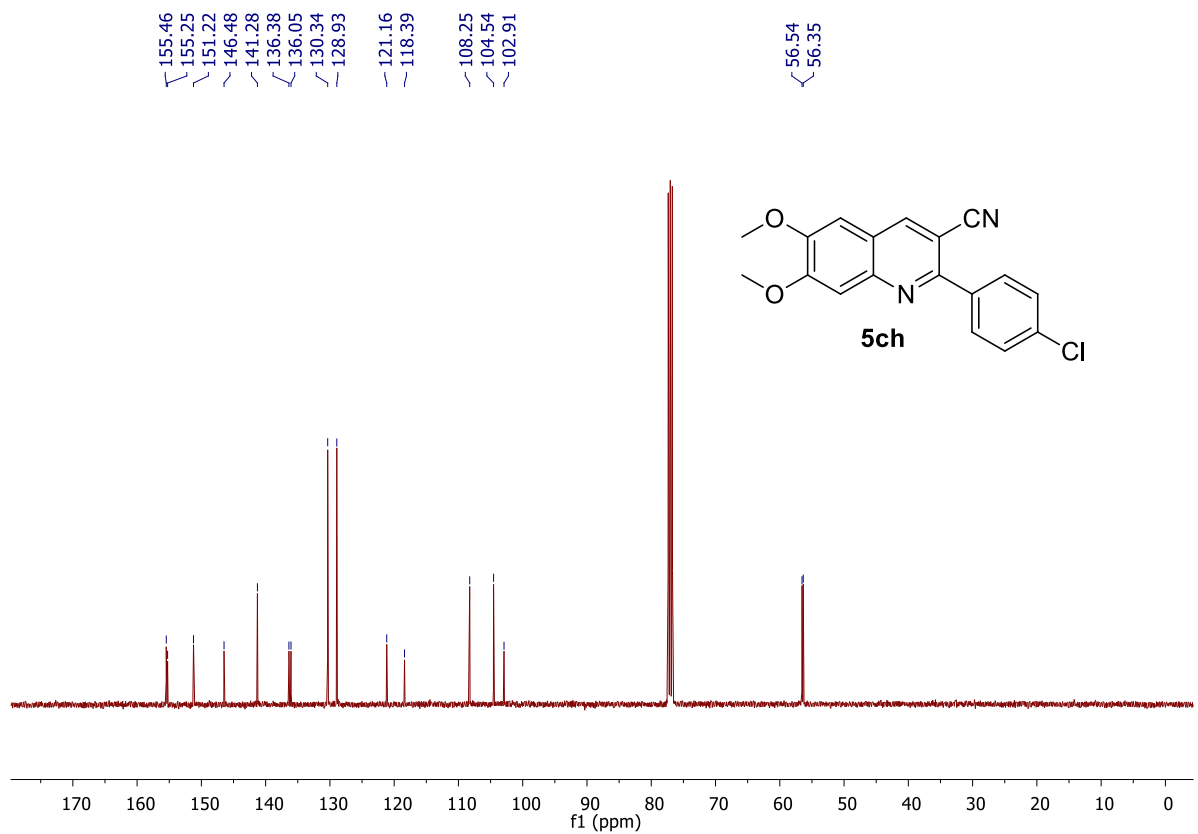

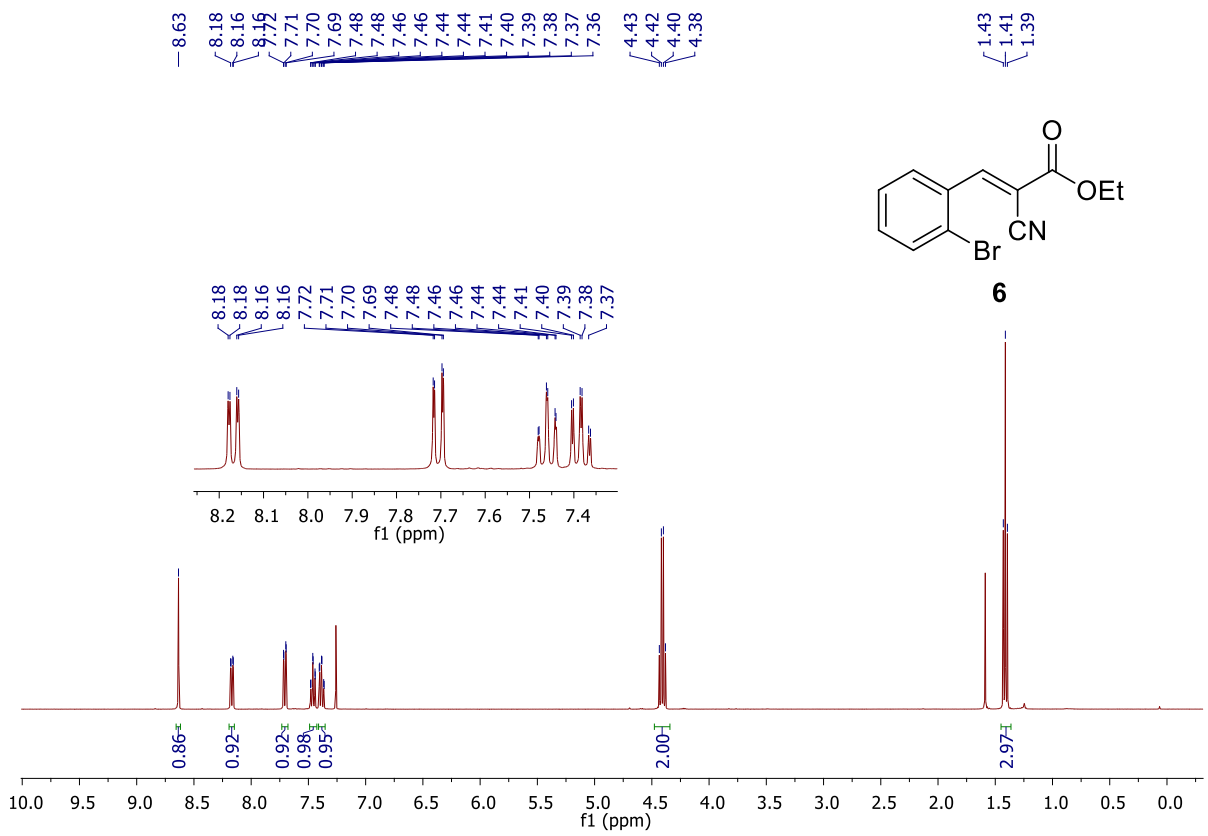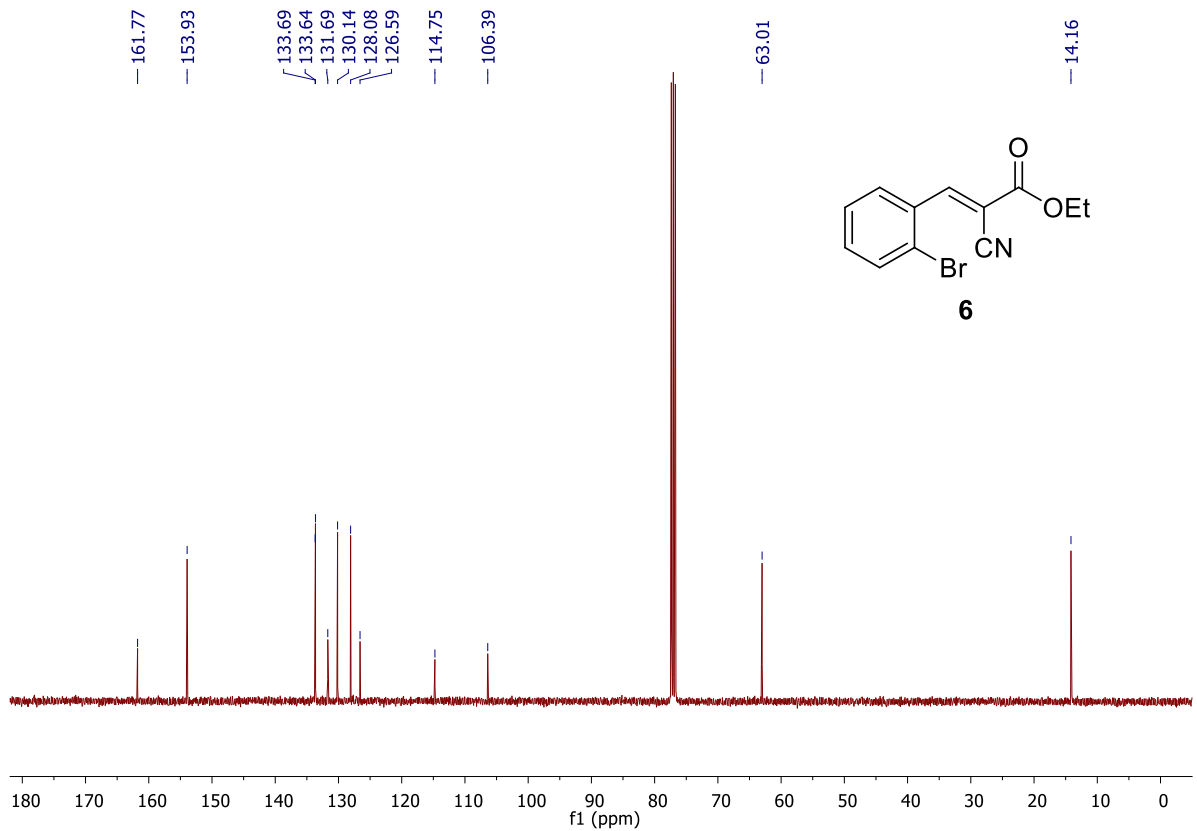

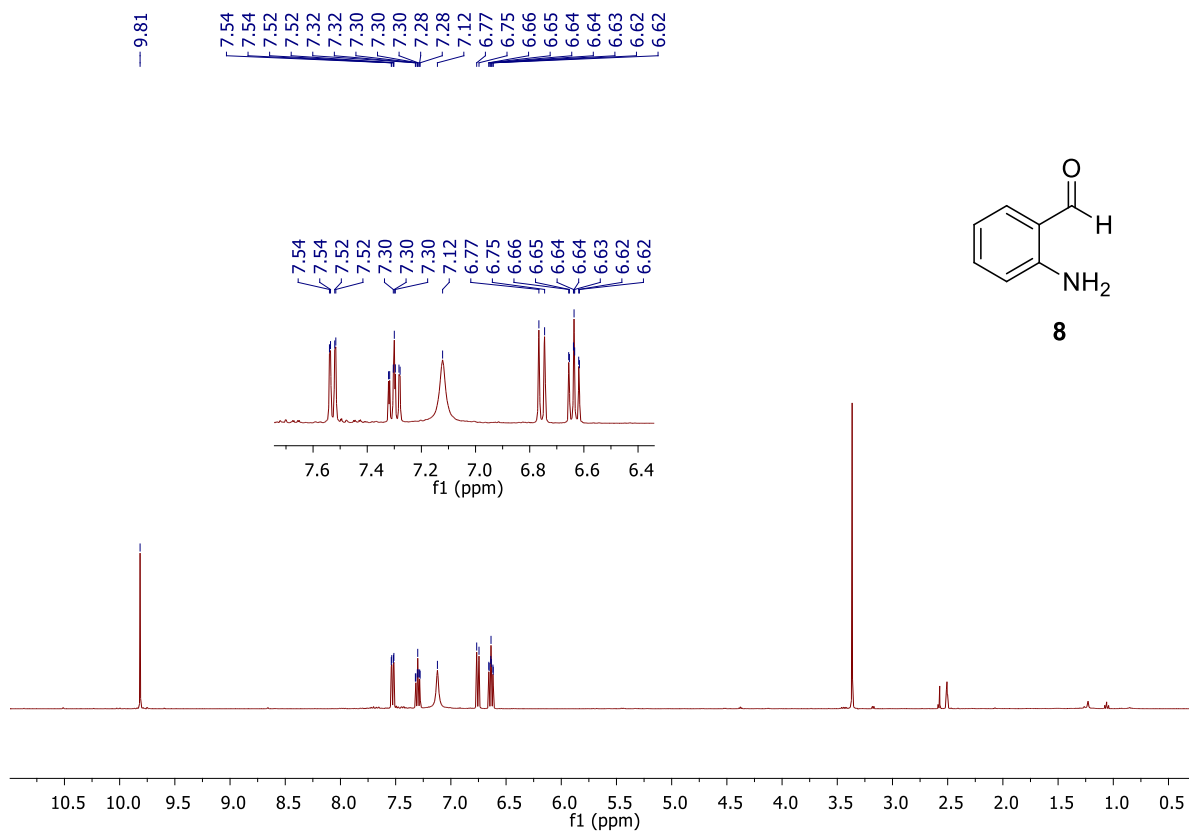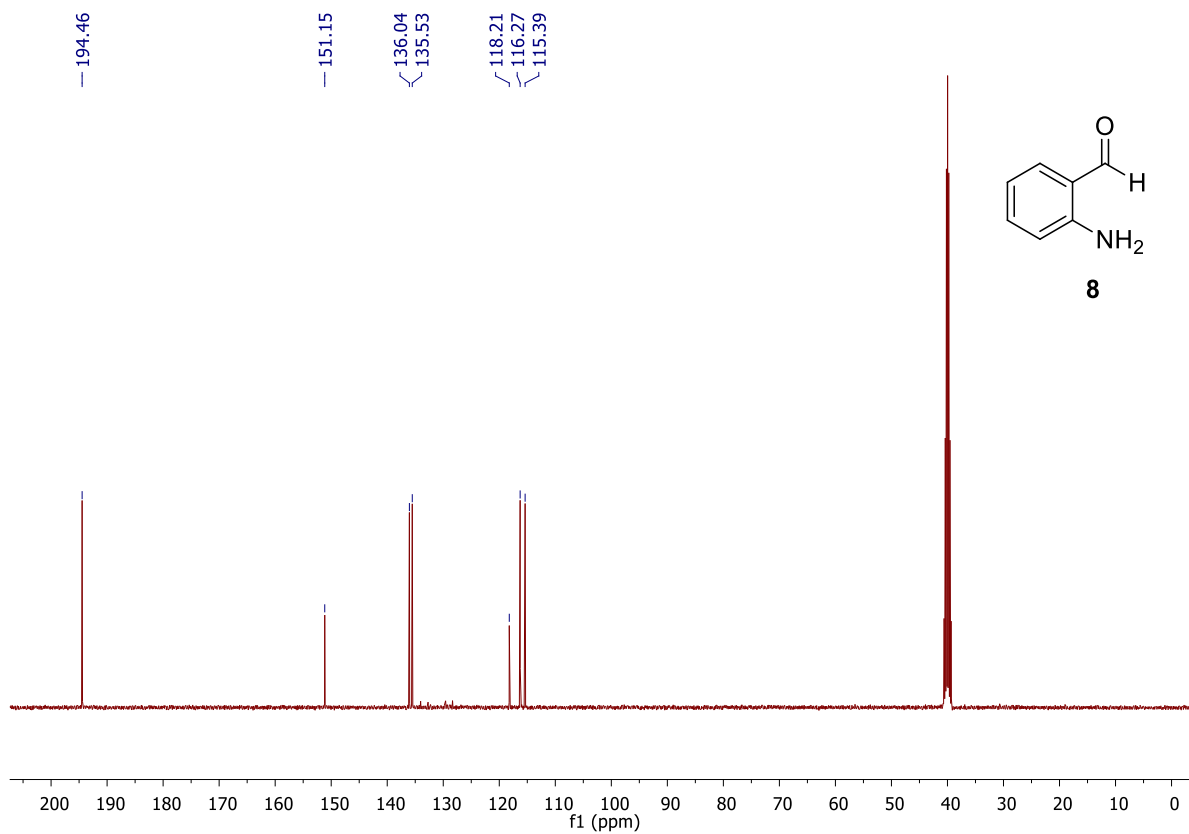

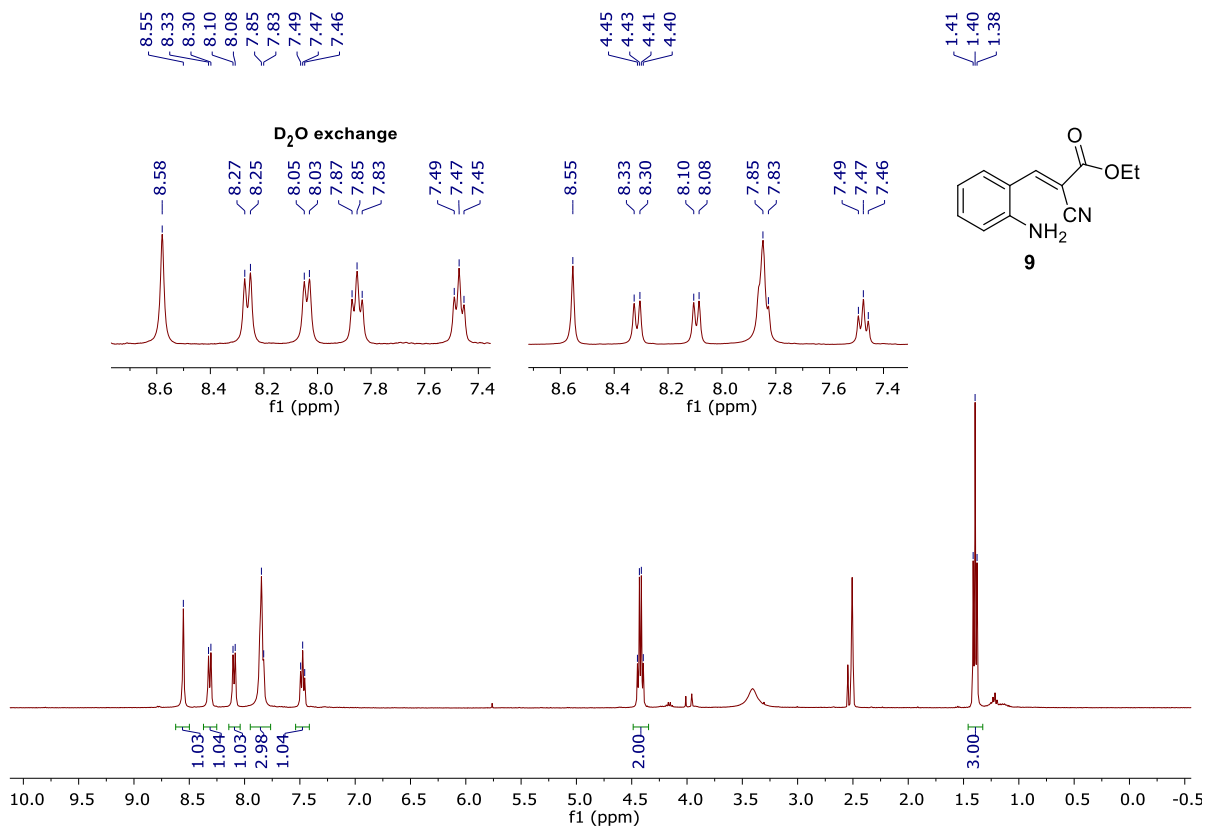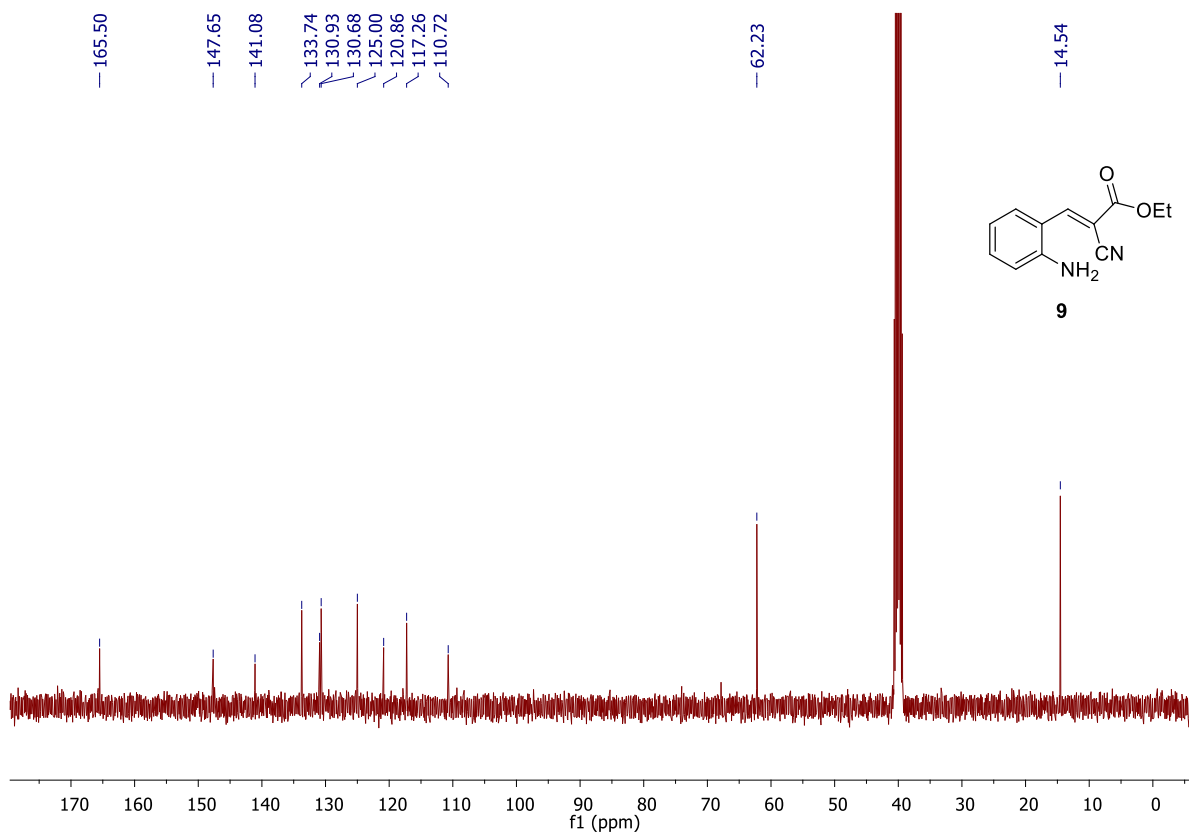



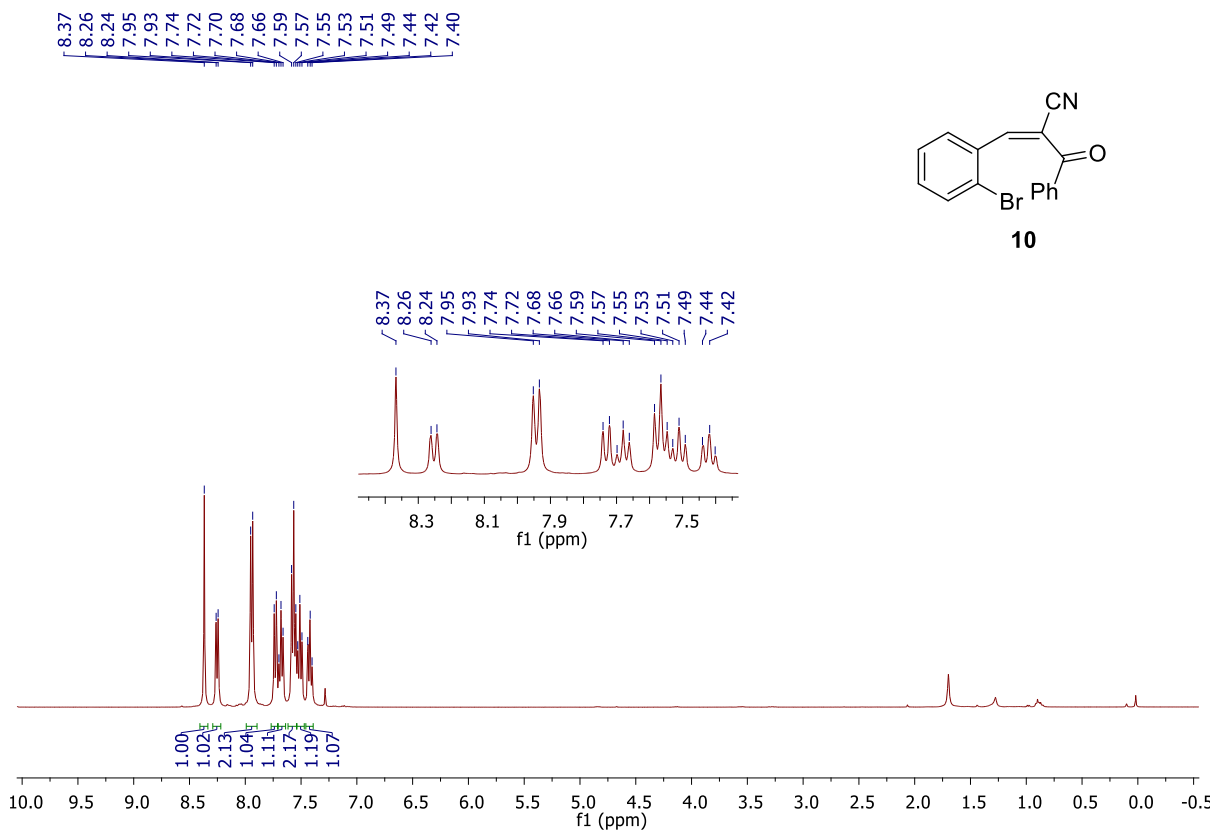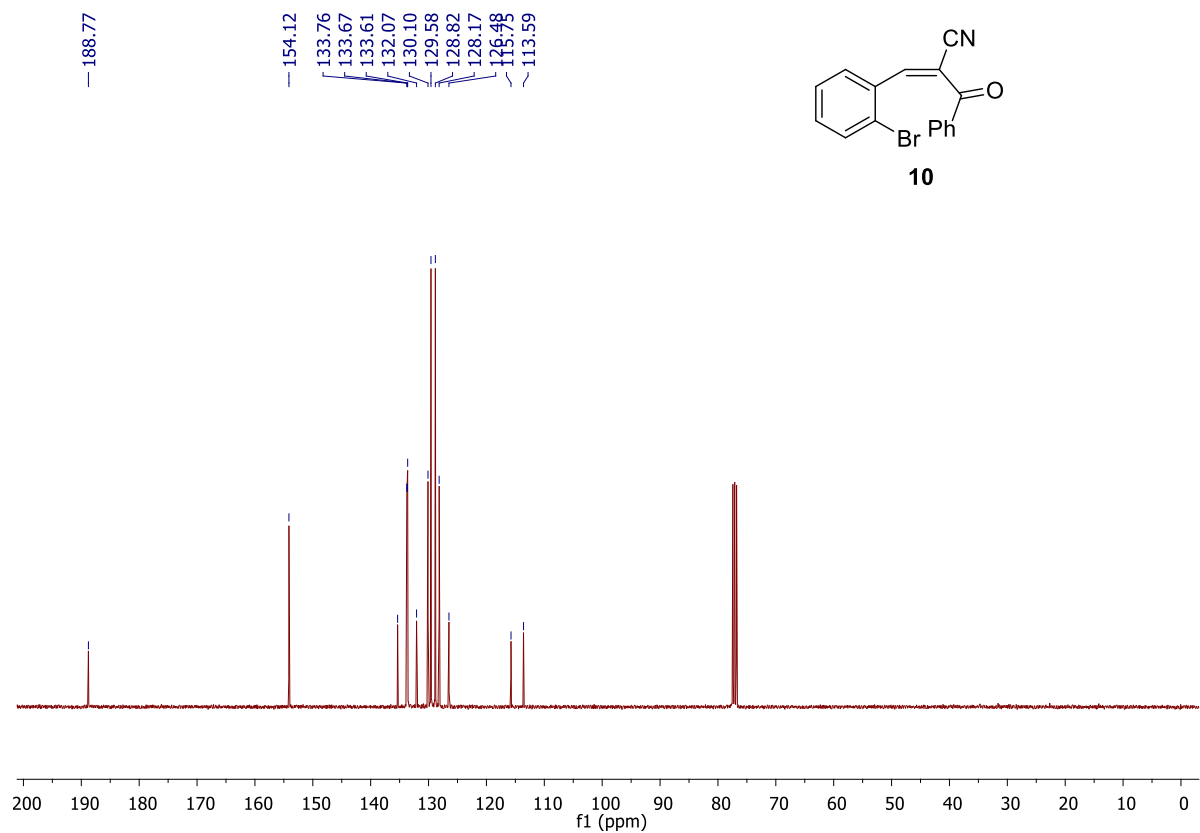

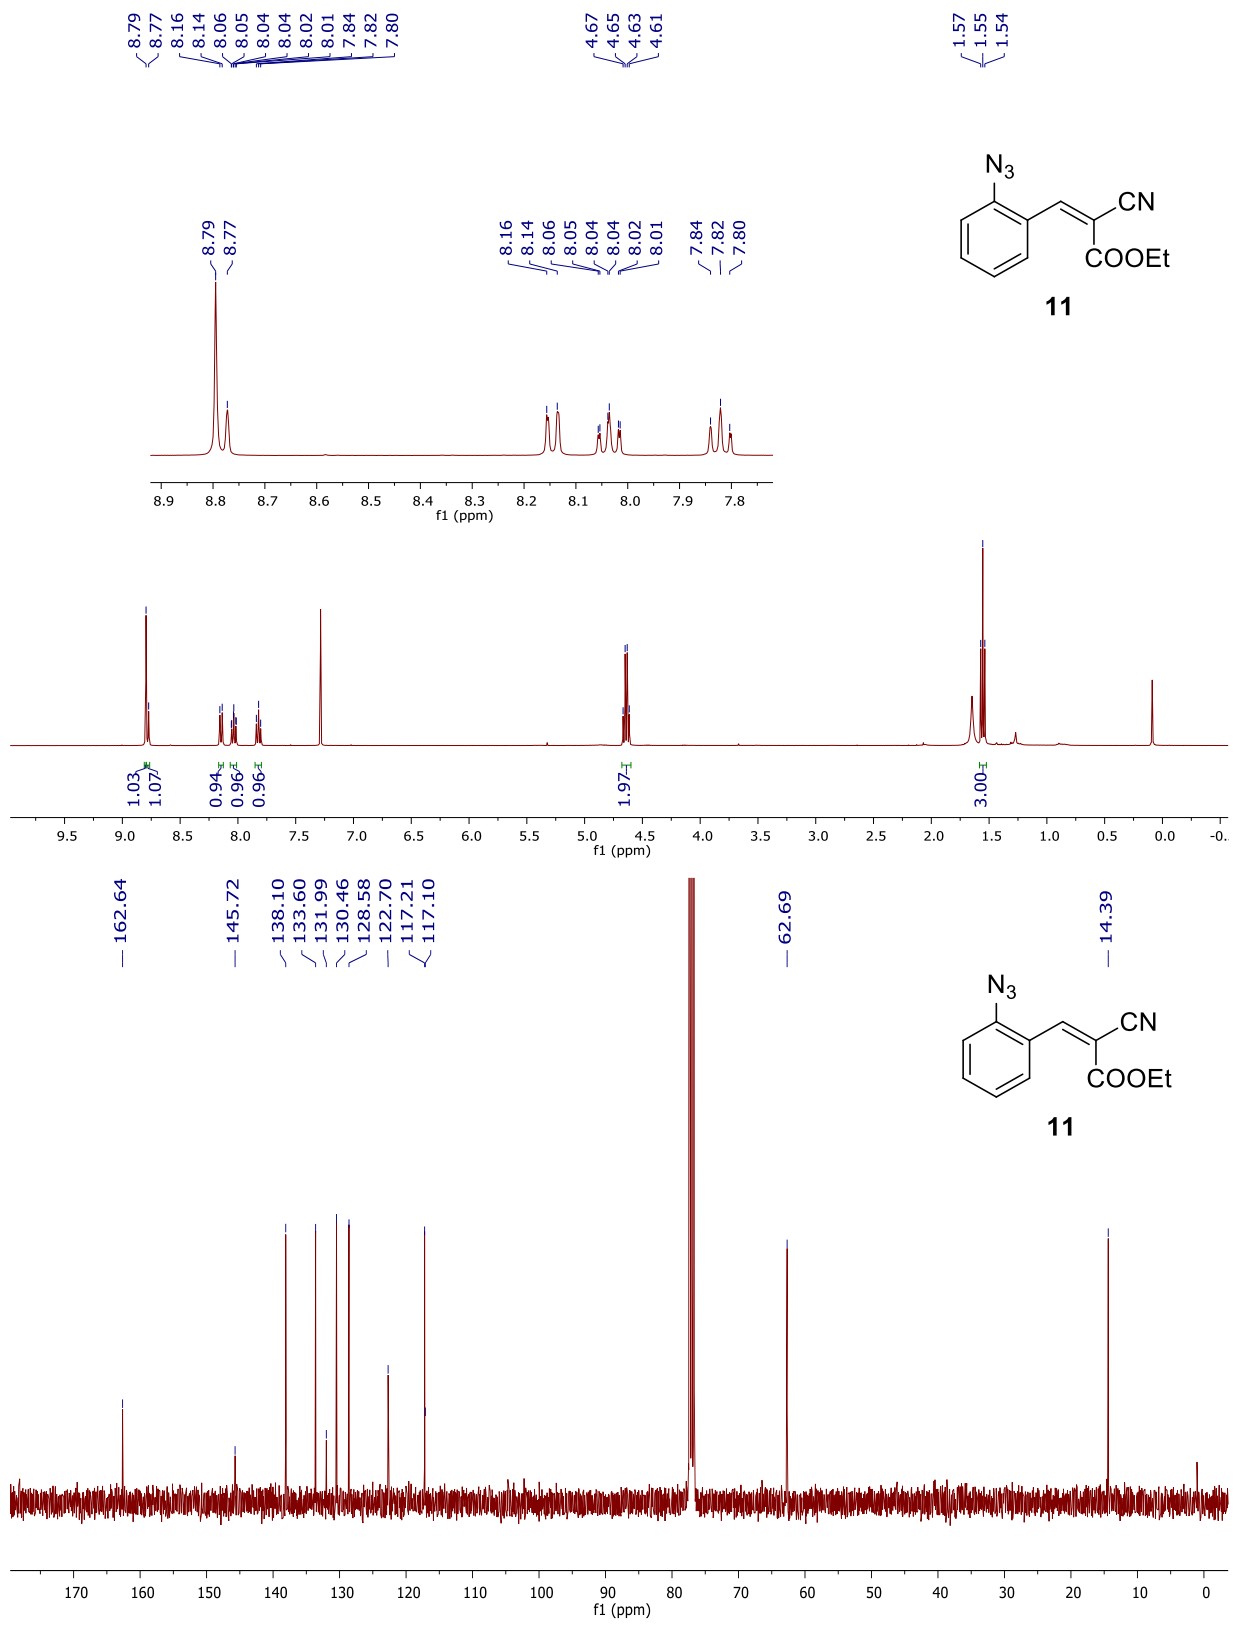

LC-MS of 11

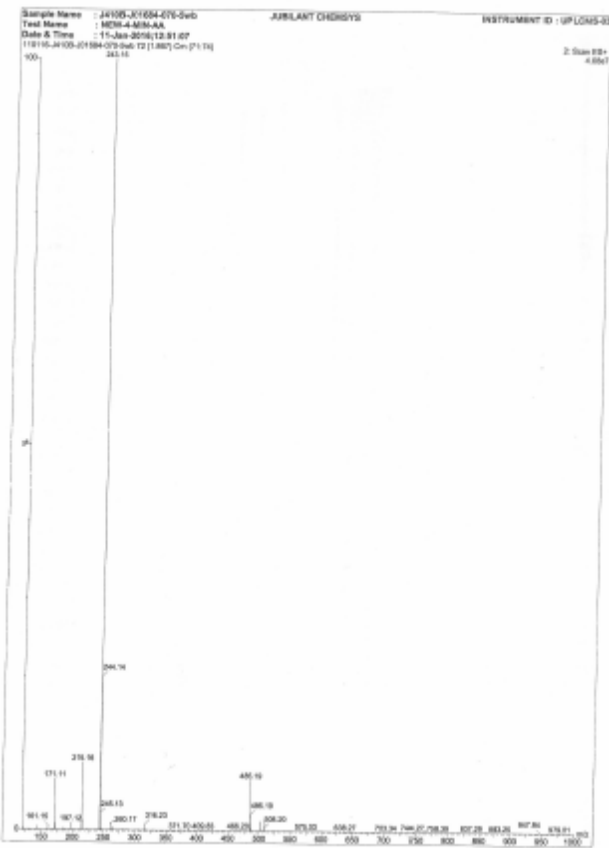

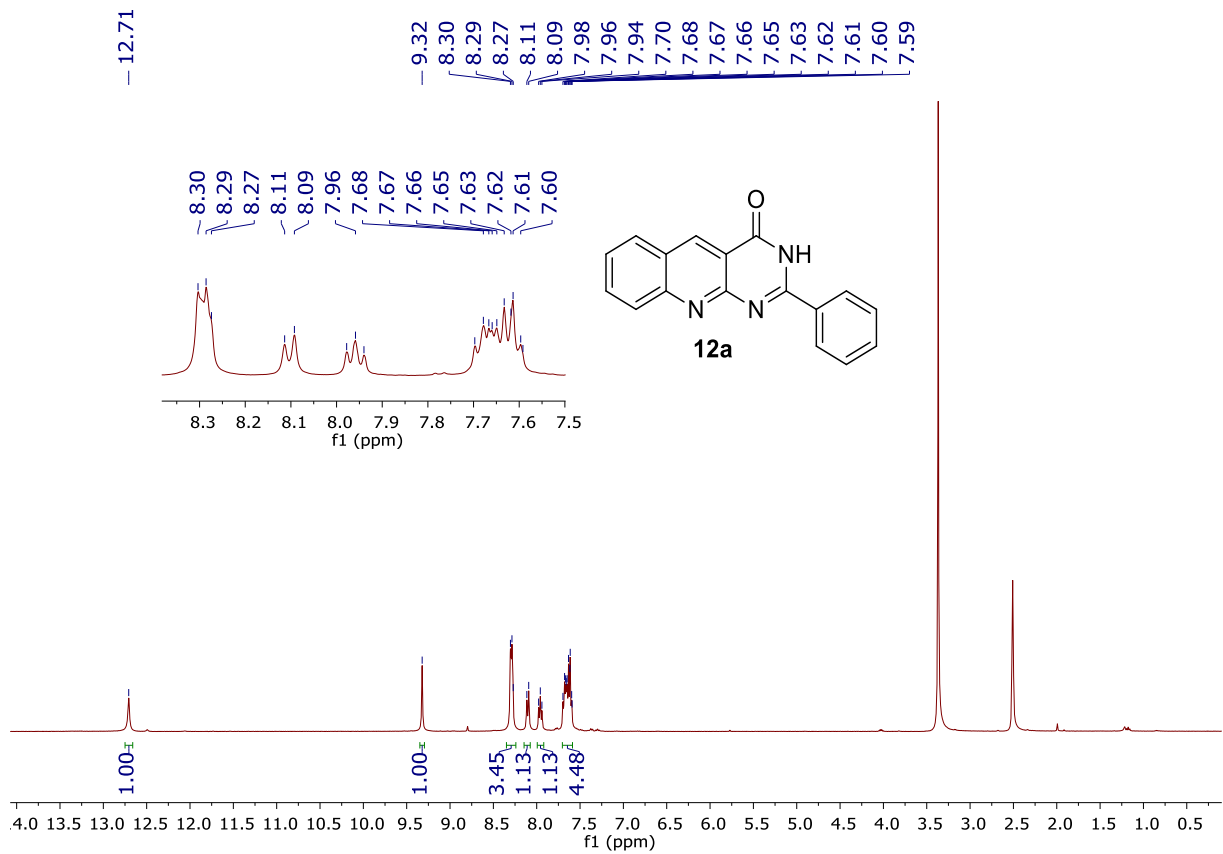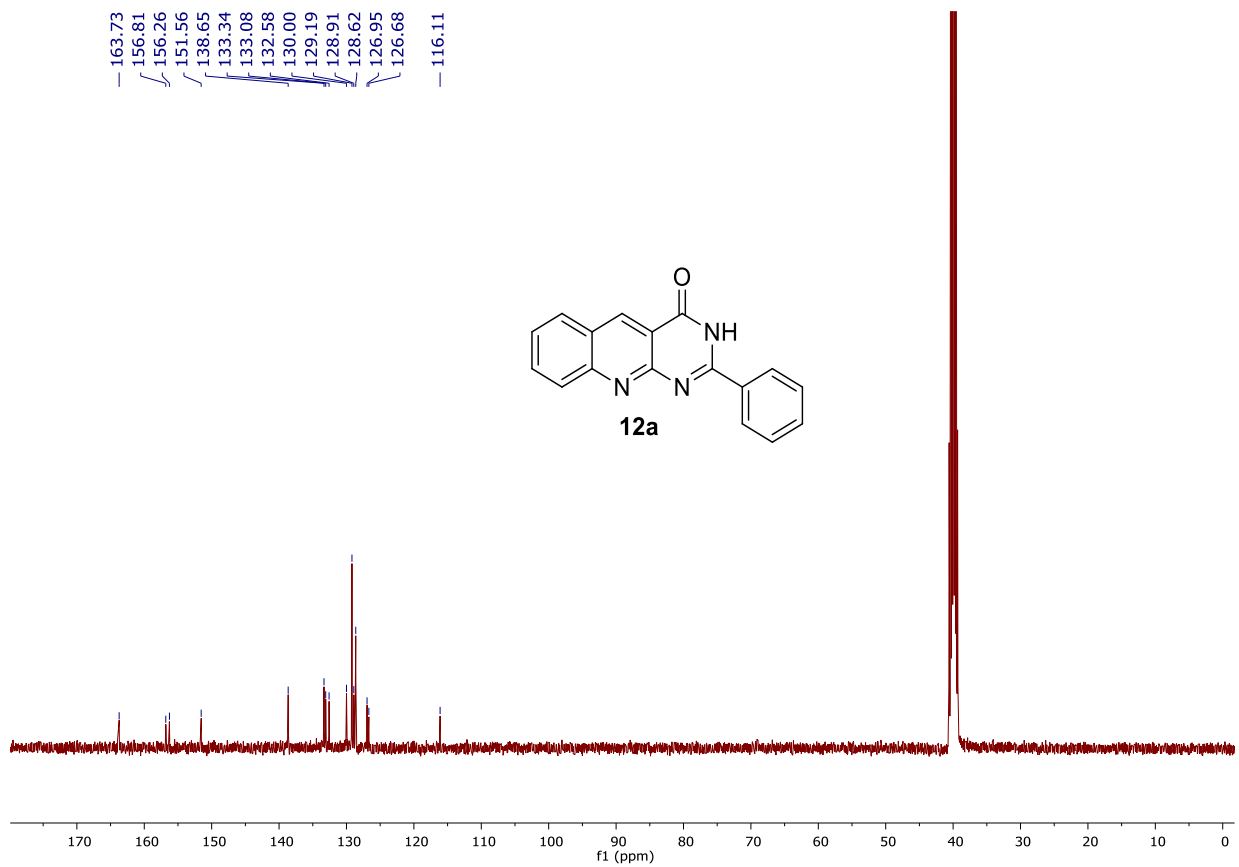

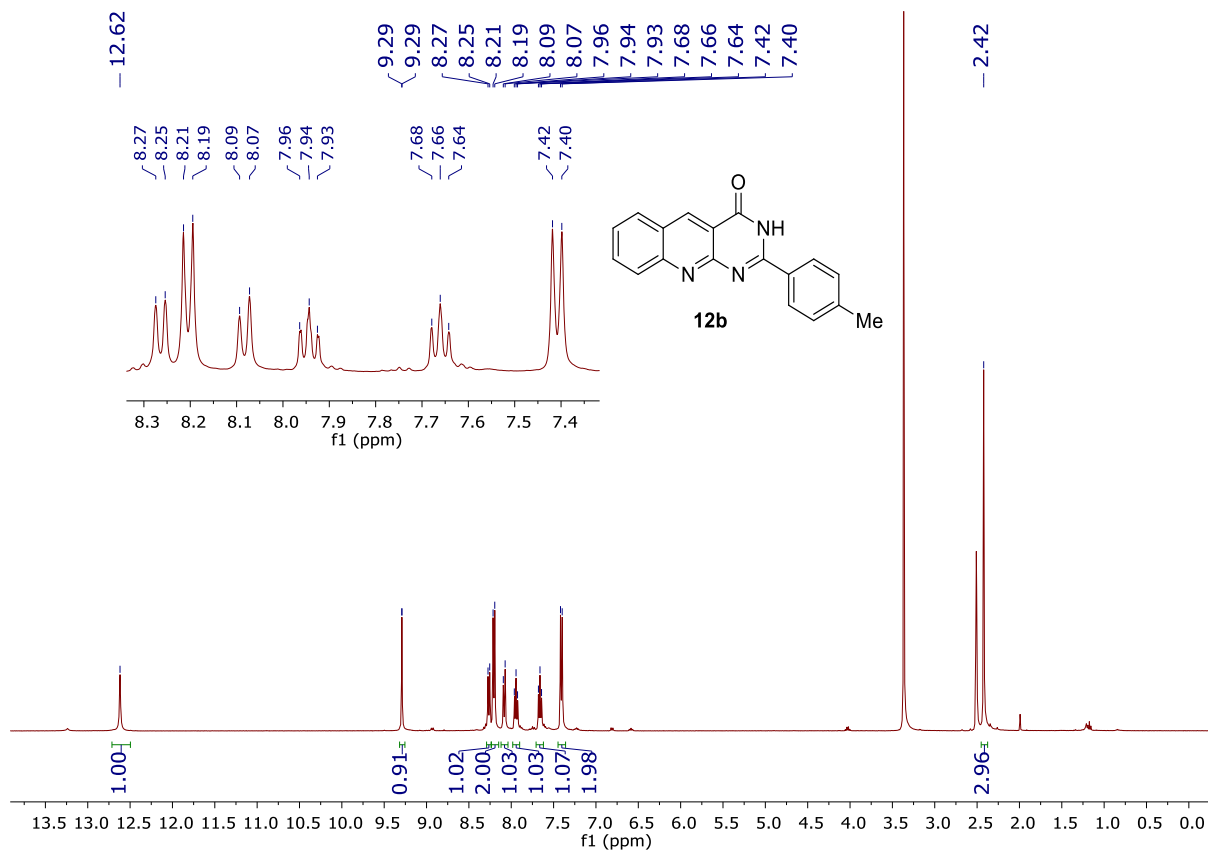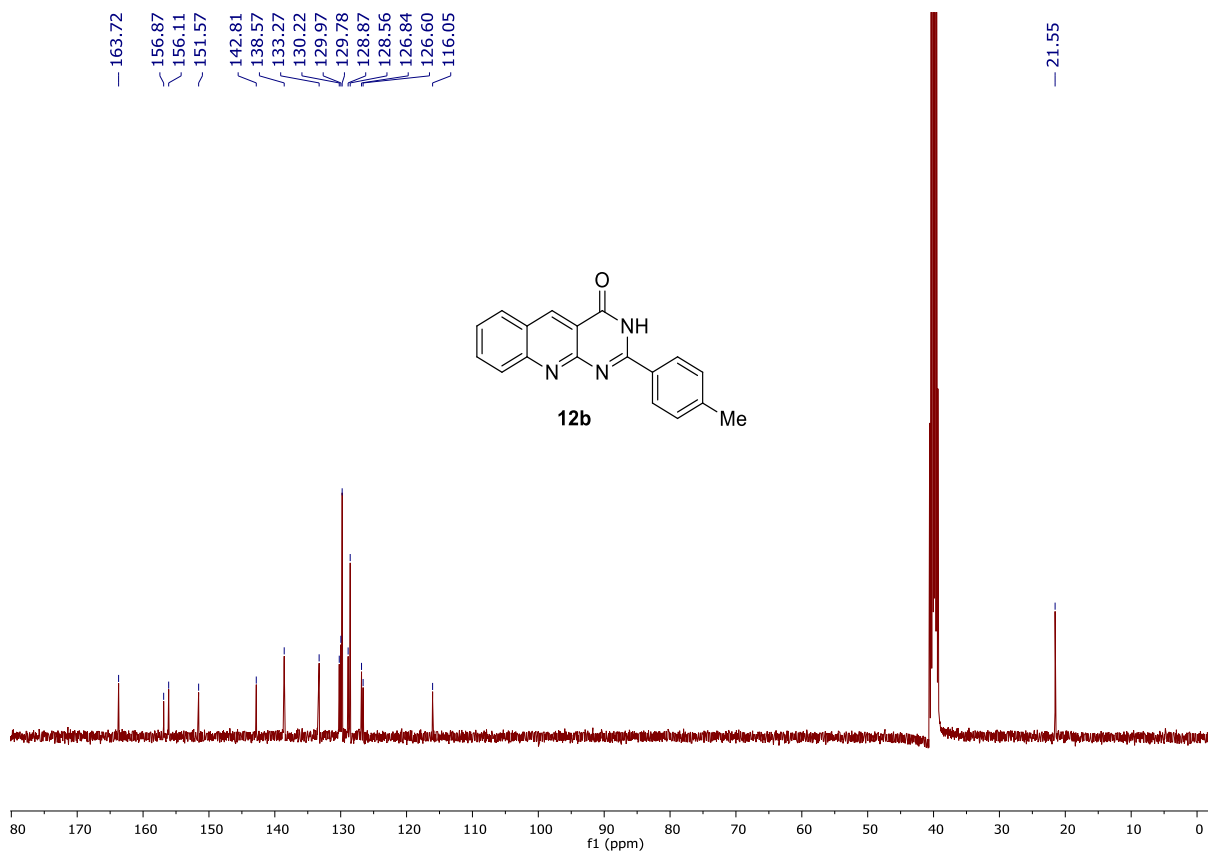

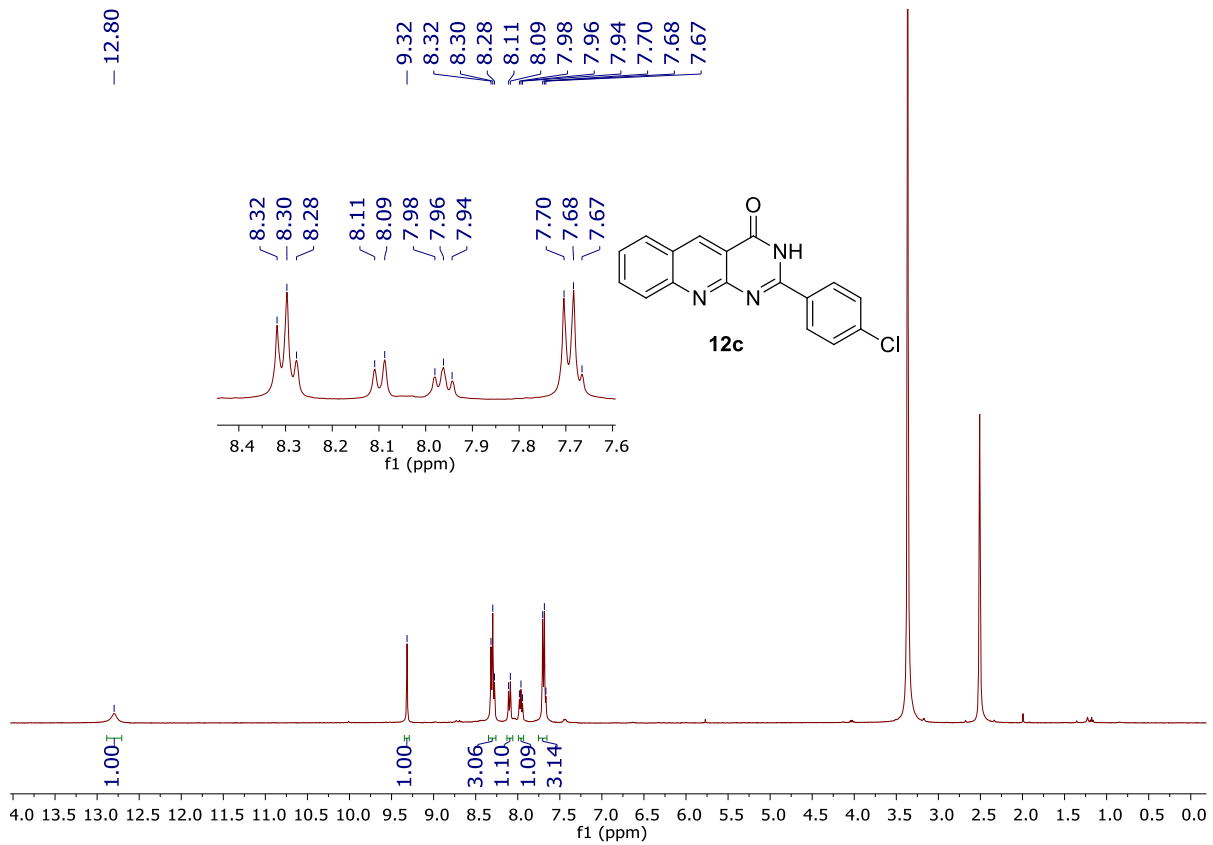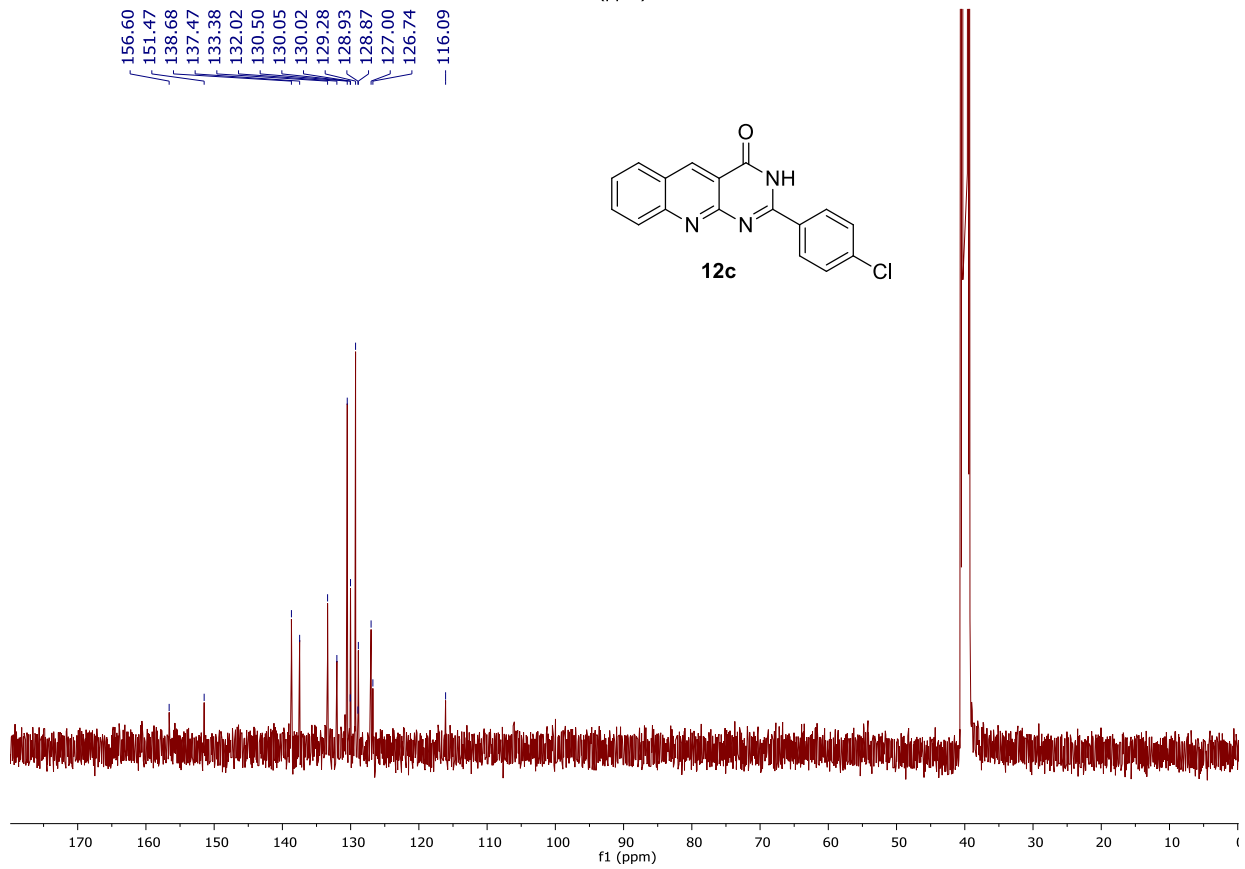

## Crystal Structure Report for 10 (CCDC 1433055)

**Table 1. Sample and crystal data**

|                               |                          |                             |
|-------------------------------|--------------------------|-----------------------------|
| <b>Identification code</b>    | vbchem114                |                             |
| <b>Chemical formula</b>       | CHBrNO                   |                             |
| <b>Formula weight</b>         | 122.94 g/mol             |                             |
| <b>Temperature</b>            | 296(2) K                 |                             |
| <b>Wavelength</b>             | 0.71073 Å                |                             |
| <b>Crystal system</b>         | triclinic                |                             |
| <b>Space group</b>            | P -1                     |                             |
| <b>Unit cell dimensions</b>   | a = 8.9523(11) Å         | $\alpha = 83.854(10)^\circ$ |
|                               | b = 10.8955(15) Å        | $\beta = 89.882(9)^\circ$   |
|                               | c = 13.2918(18) Å        | $\gamma = 89.928(9)^\circ$  |
| <b>Volume</b>                 | 1289.0(3) Å <sup>3</sup> |                             |
| <b>Z</b>                      | 16                       |                             |
| <b>Density (calculated)</b>   | 2.534 g/cm <sup>3</sup>  |                             |
| <b>Absorption coefficient</b> | 12.492 mm <sup>-1</sup>  |                             |
| <b>F(000)</b>                 | 912                      |                             |

**Table 2. Data collection and structure refinement**

|                                            |                                                                                                                                                                       |                           |
|--------------------------------------------|-----------------------------------------------------------------------------------------------------------------------------------------------------------------------|---------------------------|
| <b>Theta range for data collection</b>     | 1.54 to 28.89°                                                                                                                                                        |                           |
| <b>Index ranges</b>                        | -12 ≤ h ≤ 12, -14 ≤ k ≤ 14, -17 ≤ l ≤ 17                                                                                                                              |                           |
| <b>Reflections collected</b>               | 41097                                                                                                                                                                 |                           |
| <b>Independent reflections</b>             | 6642 [R(int) = 0.3862]                                                                                                                                                |                           |
| <b>Coverage of independent reflections</b> | 97.9%                                                                                                                                                                 |                           |
| <b>Absorption correction</b>               | multi-scan                                                                                                                                                            |                           |
| <b>Refinement method</b>                   | Full-matrix least-squares on F <sup>2</sup>                                                                                                                           |                           |
| <b>Refinement program</b>                  | SHELXL-2014/7 (Sheldrick, 2014)                                                                                                                                       |                           |
| <b>Function minimized</b>                  | $\sum w(F_o^2 - F_c^2)^2$                                                                                                                                             |                           |
| <b>Data / restraints / parameters</b>      | 6642 / 0 / 343                                                                                                                                                        |                           |
| <b>Goodness-of-fit on F<sup>2</sup></b>    | 1.410                                                                                                                                                                 |                           |
| <b>Final R indices</b>                     | 2552 data; I > 2σ(I)                                                                                                                                                  | R1 = 0.1575, wR2 = 0.2795 |
|                                            | all data                                                                                                                                                              | R1 = 0.3435, wR2 = 0.3407 |
| <b>Weighting scheme</b>                    | w = 1/[σ <sup>2</sup> (F <sub>o</sub> <sup>2</sup> ) + (0.1000P) <sup>2</sup> + 0.6035P]<br>where P = (F <sub>o</sub> <sup>2</sup> + 2F <sub>c</sub> <sup>2</sup> )/3 |                           |
| <b>Largest diff. peak and hole</b>         | 1.172 and -2.442 eÅ <sup>-3</sup>                                                                                                                                     |                           |
| <b>R.M.S. deviation from mean</b>          | 0.342 eÅ <sup>-3</sup>                                                                                                                                                |                           |

**Table 3. Atomic coordinates and equivalent isotropic atomic displacement parameters ( $\text{\AA}^2$ )**

U(eq) is defined as one third of the trace of the orthogonalized  $U_{ij}$  tensor.

|     | x/a         | y/b         | z/c         | U(eq)     |
|-----|-------------|-------------|-------------|-----------|
| Br1 | 0.60369(15) | 0.69560(14) | 0.83172(11) | 0.0500(5) |
| Br2 | 0.10329(15) | 0.80468(14) | 0.66867(11) | 0.0506(5) |
| O1  | 0.9436(9)   | 0.6540(9)   | 0.9648(7)   | 0.054(3)  |
| O2  | 0.4430(9)   | 0.8458(9)   | 0.5355(7)   | 0.051(3)  |
| C26 | 0.8130(12)  | 0.9171(10)  | 0.5811(8)   | 0.023(3)  |
| C11 | 0.4127(12)  | 0.4928(11)  | 0.8810(8)   | 0.025(3)  |
| C24 | 0.6670(11)  | 0.9044(10)  | 0.5990(8)   | 0.022(3)  |
| C27 | 0.9104(11)  | 0.0081(10)  | 0.6184(8)   | 0.021(3)  |
| N2  | 0.5303(12)  | 0.0301(11)  | 0.7224(9)   | 0.053(3)  |
| C10 | 0.3134(12)  | 0.5834(10)  | 0.9178(8)   | 0.025(3)  |
| C28 | 0.0510(13)  | 0.9716(10)  | 0.6573(9)   | 0.027(3)  |
| C1  | 0.1367(13)  | 0.7953(11)  | 0.9798(9)   | 0.031(3)  |
| C6  | 0.2482(13)  | 0.8594(12)  | 0.9246(10)  | 0.037(3)  |
| C25 | 0.5917(14)  | 0.9761(13)  | 0.6660(10)  | 0.040(3)  |
| C7  | 0.0678(14)  | 0.6820(12)  | 0.9475(9)   | 0.034(3)  |
| C8  | 0.1679(11)  | 0.5961(10)  | 0.9002(8)   | 0.022(3)  |
| C12 | 0.5517(13)  | 0.5272(11)  | 0.8441(8)   | 0.027(3)  |
| N1  | 0.0322(13)  | 0.4726(12)  | 0.7763(10)  | 0.058(4)  |
| C16 | 0.3682(14)  | 0.3704(12)  | 0.8881(9)   | 0.038(3)  |
| C29 | 0.1508(13)  | 0.0522(13)  | 0.6904(9)   | 0.037(3)  |
| C9  | 0.0936(14)  | 0.5236(13)  | 0.8350(11)  | 0.042(3)  |
| C32 | 0.8698(14)  | 0.1305(12)  | 0.6139(9)   | 0.039(3)  |
| C18 | 0.7488(14)  | 0.6418(12)  | 0.5745(10)  | 0.039(3)  |
| C23 | 0.5687(14)  | 0.8178(11)  | 0.5518(9)   | 0.033(3)  |
| C31 | 0.9671(15)  | 0.2133(13)  | 0.6487(9)   | 0.040(3)  |
| C17 | 0.6362(12)  | 0.7056(12)  | 0.5193(9)   | 0.030(3)  |
| C15 | 0.4680(15)  | 0.2877(13)  | 0.8525(10)  | 0.044(3)  |
| C13 | 0.6516(14)  | 0.4463(14)  | 0.8084(10)  | 0.041(3)  |
| C30 | 0.1078(16)  | 0.1758(15)  | 0.6855(10)  | 0.053(4)  |
| C2  | 0.0718(15)  | 0.8384(14)  | 0.0669(10)  | 0.048(4)  |



|     | <b>x/a</b> | <b>y/b</b> | <b>z/c</b> | <b>U(eq)</b> |
|-----|------------|------------|------------|--------------|
| C22 | 0.5754(15) | 0.6607(13) | 0.4332(10) | 0.046(4)     |
| C14 | 0.6106(16) | 0.3280(15) | 0.8148(9)  | 0.049(4)     |
| C5  | 0.3053(15) | 0.9665(12) | 0.9598(12) | 0.047(4)     |
| C21 | 0.6369(18) | 0.5529(14) | 0.4033(11) | 0.056(4)     |
| C4  | 0.2500(18) | 0.0126(14) | 0.0420(13) | 0.058(4)     |
| C20 | 0.7503(18) | 0.4885(14) | 0.4563(12) | 0.052(4)     |
| C3  | 0.1345(18) | 0.9483(16) | 0.0979(12) | 0.062(5)     |
| C19 | 0.8027(16) | 0.5314(13) | 0.5392(12) | 0.054(4)     |

**Table 4. Bond lengths (Å).**

|         |           |         |           |
|---------|-----------|---------|-----------|
| Br1-C12 | 1.884(11) | Br2-C28 | 1.868(11) |
| O1-C7   | 1.169(13) | O2-C23  | 1.179(14) |
| C26-C24 | 1.333(14) | C26-C27 | 1.449(15) |
| C11-C12 | 1.374(15) | C11-C16 | 1.387(17) |
| C11-C10 | 1.451(15) | C24-C25 | 1.415(17) |
| C24-C23 | 1.480(16) | C27-C32 | 1.377(16) |
| C27-C28 | 1.403(16) | N2-C25  | 1.141(16) |
| C10-C8  | 1.328(15) | C28-C29 | 1.360(17) |
| C1-C6   | 1.382(16) | C1-C2   | 1.418(17) |
| C1-C7   | 1.485(17) | C6-C5   | 1.400(18) |
| C7-C8   | 1.482(16) | C8-C9   | 1.403(18) |
| C12-C13 | 1.374(17) | N1-C9   | 1.147(17) |
| C16-C15 | 1.386(17) | C29-C30 | 1.40(2)   |
| C32-C31 | 1.371(17) | C18-C17 | 1.390(17) |
| C18-C19 | 1.420(18) | C23-C17 | 1.468(16) |
| C31-C30 | 1.396(19) | C17-C22 | 1.403(17) |
| C15-C14 | 1.423(19) | C13-C14 | 1.33(2)   |
| C2-C3   | 1.42(2)   | C22-C21 | 1.39(2)   |
| C5-C4   | 1.34(2)   | C21-C20 | 1.38(2)   |
| C4-C3   | 1.41(2)   | C20-C19 | 1.33(2)   |

**Table 5. Bond angles (°)**

|             |           |             |           |
|-------------|-----------|-------------|-----------|
| C24-C26-C27 | 126.3(10) | C12-C11-C16 | 120.6(11) |
| C12-C11-C10 | 120.3(10) | C16-C11-C10 | 119.1(10) |
| C26-C24-C25 | 121.6(10) | C26-C24-C23 | 124.6(10) |
| C25-C24-C23 | 113.8(10) | C32-C27-C28 | 119.2(10) |
| C32-C27-C26 | 121.5(10) | C28-C27-C26 | 119.3(10) |
| C8-C10-C11  | 127.0(10) | C29-C28-C27 | 122.9(11) |
| C29-C28-Br2 | 117.8(10) | C27-C28-Br2 | 119.3(9)  |
| C6-C1-C2    | 122.4(12) | C6-C1-C7    | 122.4(11) |
| C2-C1-C7    | 115.1(11) | C1-C6-C5    | 118.6(12) |
| N2-C25-C24  | 177.6(15) | O1-C7-C8    | 119.6(11) |
| O1-C7-C1    | 123.2(11) | C8-C7-C1    | 117.0(10) |
| C10-C8-C9   | 121.4(10) | C10-C8-C7   | 125.2(10) |
| C9-C8-C7    | 113.4(10) | C13-C12-C11 | 123.4(11) |
| C13-C12-Br1 | 117.6(9)  | C11-C12-Br1 | 118.8(9)  |
| C15-C16-C11 | 116.6(12) | C28-C29-C30 | 117.2(12) |
| N1-C9-C8    | 174.5(16) | C31-C32-C27 | 119.1(13) |
| C17-C18-C19 | 117.6(12) | O2-C23-C17  | 123.0(11) |
| O2-C23-C24  | 118.8(11) | C17-C23-C24 | 118.0(10) |
| C32-C31-C30 | 121.0(13) | C18-C17-C22 | 121.0(12) |
| C18-C17-C23 | 121.9(11) | C22-C17-C23 | 117.0(11) |
| C16-C15-C14 | 120.6(13) | C14-C13-C12 | 116.7(12) |
| C29-C30-C31 | 120.6(12) | C1-C2-C3    | 115.9(13) |
| C21-C22-C17 | 117.3(13) | C13-C14-C15 | 122.0(12) |
| C4-C5-C6    | 122.3(13) | C20-C21-C22 | 122.7(13) |
| C5-C4-C3    | 119.2(13) | C19-C20-C21 | 118.6(14) |
| C4-C3-C2    | 121.4(13) | C20-C19-C18 | 122.7(14) |

**Table 6. Anisotropic atomic displacement parameters (Å<sup>2</sup>).**

The anisotropic atomic displacement factor exponent takes the form:  $-2\pi^2 [ h^2 a^{*2} U_{11} + \dots + 2 h k a^* b^* U_{12} ]$

|     | U <sub>11</sub> | U <sub>22</sub> | U <sub>33</sub> | U <sub>23</sub> | U <sub>13</sub> | U <sub>12</sub> |
|-----|-----------------|-----------------|-----------------|-----------------|-----------------|-----------------|
| Br1 | 0.0527(9)       | 0.0466(10)      | 0.0521(10)      | -0.0116(8)      | 0.0168(7)       | -0.0195(7)      |
| Br2 | 0.0509(9)       | 0.0492(10)      | 0.0538(10)      | -0.0156(8)      | -0.0135(7)      | 0.0197(7)       |
| O1  | 0.022(5)        | 0.073(7)        | 0.073(7)        | -0.028(6)       | 0.010(4)        | -0.011(4)       |

|     | U <sub>11</sub> | U <sub>22</sub> | U <sub>33</sub> | U <sub>23</sub> | U <sub>13</sub> | U <sub>12</sub> |
|-----|-----------------|-----------------|-----------------|-----------------|-----------------|-----------------|
| O2  | 0.022(5)        | 0.065(7)        | 0.070(7)        | -0.026(6)       | -0.009(4)       | 0.014(4)        |
| C26 | 0.029(6)        | 0.017(6)        | 0.023(6)        | -0.007(5)       | -0.002(5)       | 0.004(5)        |
| C11 | 0.028(6)        | 0.030(8)        | 0.019(6)        | -0.011(5)       | 0.001(5)        | -0.004(5)       |
| C24 | 0.029(6)        | 0.019(7)        | 0.020(6)        | -0.012(5)       | 0.002(5)        | 0.005(5)        |
| C27 | 0.024(6)        | 0.022(7)        | 0.019(6)        | -0.013(5)       | 0.006(4)        | 0.003(5)        |
| N2  | 0.042(7)        | 0.058(9)        | 0.064(9)        | -0.033(7)       | 0.015(6)        | 0.004(6)        |
| C10 | 0.038(7)        | 0.017(7)        | 0.022(7)        | -0.006(5)       | 0.011(5)        | -0.005(5)       |
| C28 | 0.045(7)        | 0.012(6)        | 0.025(7)        | -0.003(5)       | 0.014(5)        | 0.006(5)        |
| C1  | 0.037(7)        | 0.034(8)        | 0.024(7)        | -0.016(6)       | -0.006(5)       | 0.009(6)        |
| C6  | 0.034(7)        | 0.029(8)        | 0.046(8)        | 0.001(7)        | 0.009(6)        | 0.001(6)        |
| C25 | 0.036(7)        | 0.048(10)       | 0.036(8)        | -0.005(7)       | -0.006(6)       | -0.014(6)       |
| C7  | 0.038(8)        | 0.032(8)        | 0.035(8)        | -0.017(6)       | 0.001(6)        | -0.001(6)       |
| C8  | 0.025(6)        | 0.018(7)        | 0.022(6)        | -0.005(5)       | -0.001(5)       | -0.004(5)       |
| C12 | 0.043(7)        | 0.018(7)        | 0.022(7)        | -0.012(5)       | 0.002(5)        | -0.014(5)       |
| N1  | 0.044(7)        | 0.065(9)        | 0.072(9)        | -0.039(8)       | -0.008(6)       | -0.001(6)       |
| C16 | 0.061(9)        | 0.024(8)        | 0.033(8)        | -0.017(6)       | -0.008(6)       | 0.005(6)        |
| C29 | 0.033(7)        | 0.047(10)       | 0.033(8)        | -0.011(7)       | 0.000(5)        | -0.008(6)       |
| C9  | 0.041(8)        | 0.034(9)        | 0.053(10)       | -0.016(8)       | 0.017(7)        | 0.010(6)        |
| C32 | 0.060(9)        | 0.034(9)        | 0.025(7)        | -0.013(6)       | 0.016(6)        | -0.014(7)       |
| C18 | 0.042(8)        | 0.033(8)        | 0.043(8)        | -0.004(7)       | 0.003(6)        | 0.005(6)        |
| C23 | 0.046(8)        | 0.025(8)        | 0.028(7)        | -0.013(6)       | 0.004(6)        | -0.003(6)       |
| C31 | 0.050(8)        | 0.043(9)        | 0.026(7)        | -0.003(7)       | -0.001(6)       | -0.004(7)       |
| C17 | 0.031(7)        | 0.040(8)        | 0.021(7)        | -0.011(6)       | 0.003(5)        | -0.007(6)       |
| C15 | 0.055(9)        | 0.048(10)       | 0.029(8)        | -0.010(7)       | -0.006(6)       | 0.009(7)        |
| C13 | 0.036(7)        | 0.047(10)       | 0.043(9)        | -0.023(7)       | 0.002(6)        | 0.004(6)        |
| C30 | 0.059(10)       | 0.069(12)       | 0.031(8)        | -0.011(8)       | 0.013(7)        | -0.037(8)       |
| C2  | 0.052(9)        | 0.054(10)       | 0.041(9)        | -0.025(8)       | -0.008(6)       | 0.015(7)        |
| C22 | 0.057(9)        | 0.050(10)       | 0.034(8)        | -0.023(7)       | 0.008(6)        | -0.022(7)       |
| C14 | 0.056(9)        | 0.066(12)       | 0.023(8)        | -0.005(7)       | -0.006(6)       | 0.033(8)        |
| C5  | 0.059(9)        | 0.021(8)        | 0.064(11)       | -0.015(7)       | -0.009(7)       | -0.009(6)       |
| C21 | 0.078(11)       | 0.047(10)       | 0.048(10)       | -0.033(8)       | 0.015(8)        | -0.016(8)       |
| C4  | 0.076(11)       | 0.045(11)       | 0.058(11)       | -0.026(9)       | -0.014(8)       | -0.005(8)       |
| C20 | 0.077(11)       | 0.041(10)       | 0.043(9)        | -0.021(8)       | 0.002(8)        | 0.004(8)        |
| C3  | 0.078(11)       | 0.062(11)       | 0.052(10)       | -0.039(9)       | -0.018(8)       | 0.027(9)        |
| C19 | 0.067(10)       | 0.032(9)        | 0.064(11)       | -0.006(8)       | 0.014(8)        | 0.006(7)        |

## References:

1. Shen, J.; Yang, D.; Liu, Y.; Qin, S.; Zhang, J.; Sun, J.; Liu, C.; Liu, C.; Zhao, X.; Chu, C.; Liu, R., *Org. Lett.* **2014**, *16*, 350-353.
2. Wang, K.; Nguyen, K.; Huang, Y.; Dömling, A., *J. Comb. Chem.* **2009**, *11*, 920-927.
